# Supplementary material for: Characterization of the virome of Paracoccus spp. (Alphaproteobacteria) by combined in silico and in vivo approaches
Source: PubMed Central journal article supplement (PMC6536676; doi:10.1038/s41598-019-44460-4), 2019-05-27
Supplement: 41598_2019_44460_MOESM1_ESM.pdf [file 41598_2019_44460_MOESM1_ESM.pdf]

**Characterization of the virome of *Paracoccus* spp. (*Alphaproteobacteria*) by  
combined *in silico* and *in vivo* approaches**

**(Supplementary Information 1)**

**Przemyslaw Decewicz<sup>1</sup>, Lukasz Dziewit<sup>1\*</sup>, Piotr Golec<sup>1</sup>, Patrycja Kozłowska<sup>2</sup>, Dariusz Bartosik<sup>1</sup>,  
Monika Radlinska<sup>2</sup>**

<sup>1</sup> University of Warsaw, Faculty of Biology, Institute of Microbiology, Department of Bacterial Genetics, Miecznikowa 1, 02-096 Warsaw, Poland

<sup>2</sup> University of Warsaw, Faculty of Biology, Institute of Microbiology, Department of Virology, Miecznikowa 1, 02-096 Warsaw, Poland

**\* Corresponding author:** Lukasz Dziewit  
University of Warsaw, Faculty of Biology,  
Institute of Microbiology,  
Department of Bacterial Genetics,  
Miecznikowa 1, 02-096 Warsaw, Poland  
tel: 48 225541406; fax: 48 225541402;  
e-mail: ldziewit@biol.uw.edu.pl

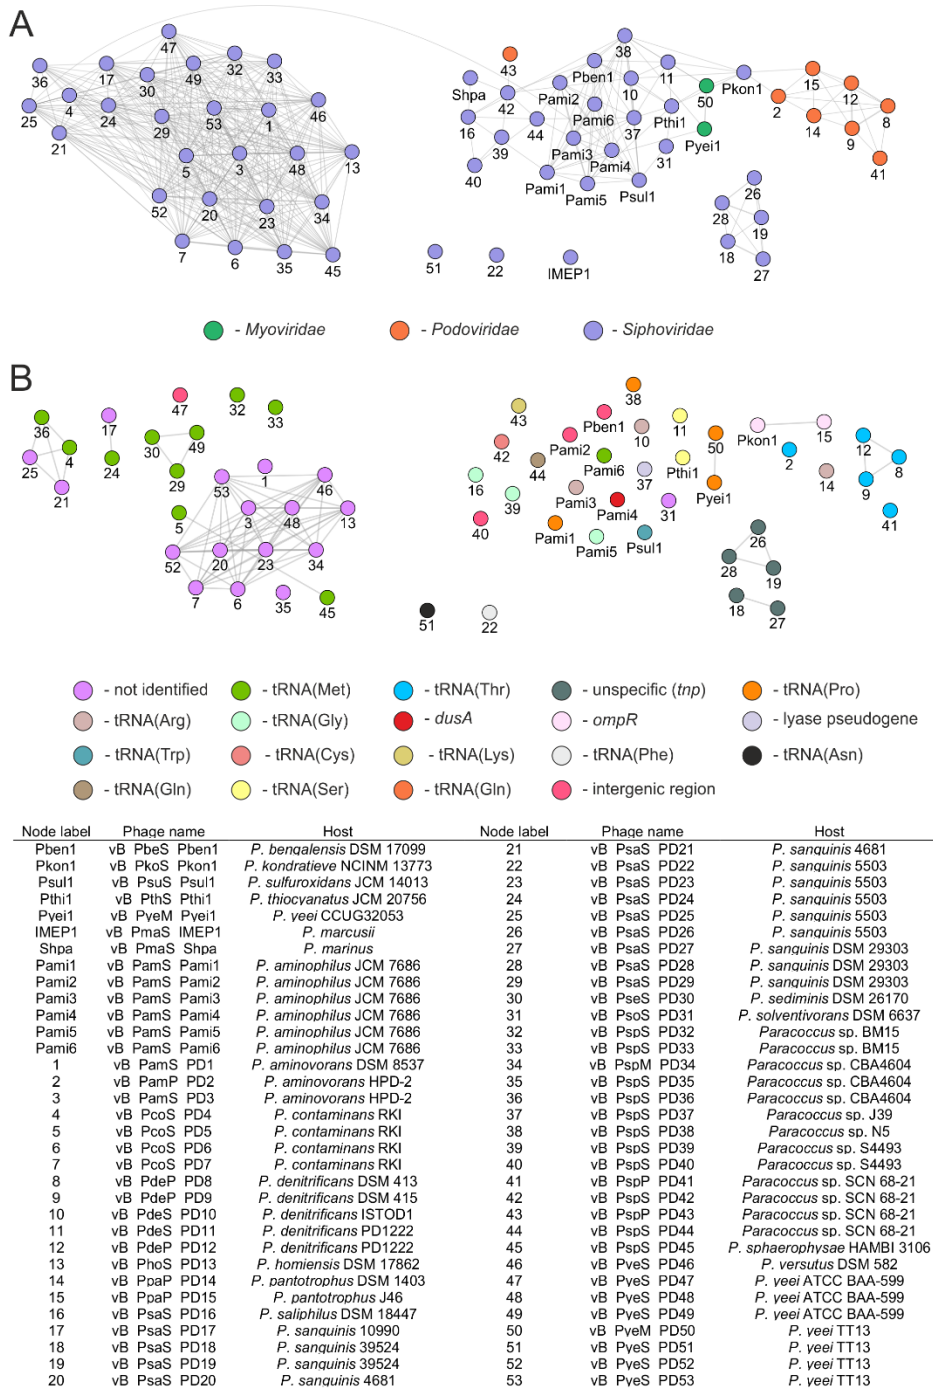

**Figure S1.** The variety of integration sites of *Paracoccus* (pro)phages. On the upper panel (A), clustering based on (pro)phage proteome is presented, while on the lower panel (B) the edges correspond to the similarity between the integrases (1e-10, at least 80% sequence identity, at least 75% query coverage) and nodes are coloured according to the recognized integration site.

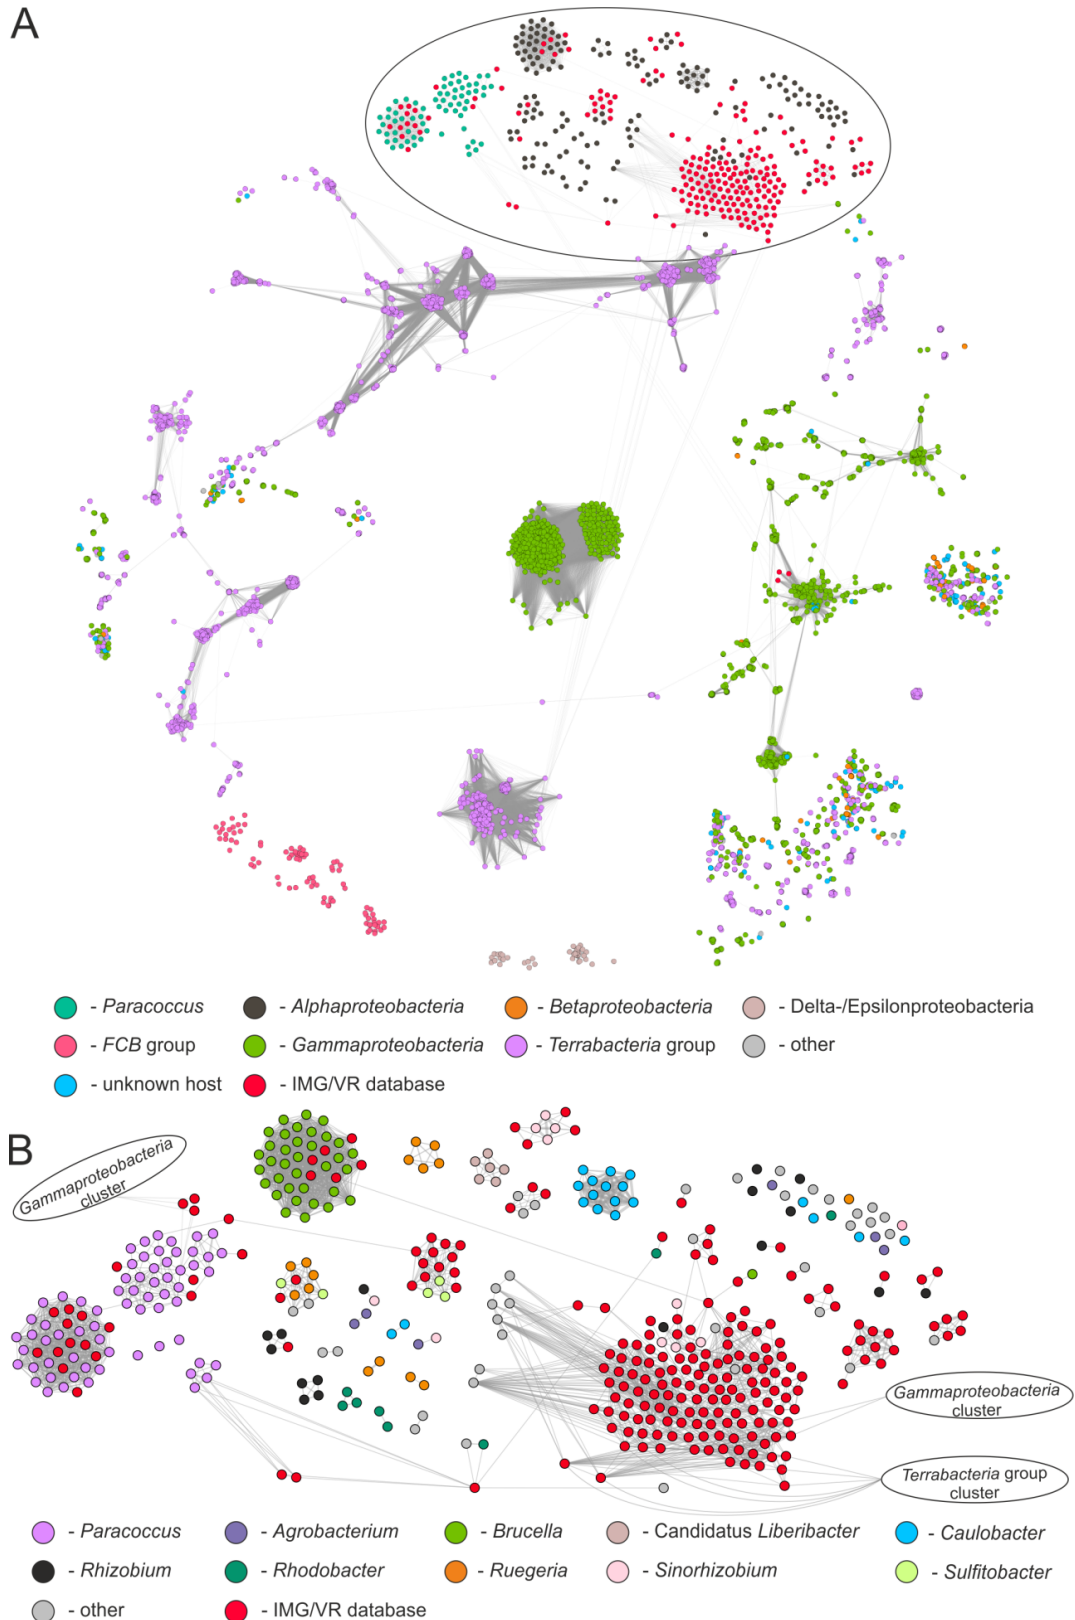

**Figure S2.** Protein-based similarity network analysis of *Paracoccus* (pro)phages, other bacteriophages retrieved from the NCBI Viruses database and selected viral contigs from the IMG/VR database (for details see *Comparative genomics* section in the manuscript). **(A)** Overall similarity network of known bacterial phages and viral contigs from the IMG/VR database. Nodes are coloured based on the taxonomy of the phage host (at phylum level, except *Proteobacteria* where classes are considered). The nodes for the IMG/VR contigs are presented in red. *Paracoccus* (pro)phages are distinguished within the network. The host taxonomy is based on manually-curated qualifiers in the source section and organism name of the virus GenBank files. **(B)** Magnified image of *Alphaproteobacteria* (pro)phage network and IMG/VR viral contigs. Outgroups connected with the main *Alphaproteobacteria* network are indicated with ellipses.

**Table S1.** Genes distinguished within the genomes of the vB\_PbeS\_Pben1, vB\_PkoS\_Pkon1, vB\_PsuS\_Psull1, vB\_PthS\_Pthi1 and vB\_PyeM\_Pyei1 phages.

| Gene                                                    | Coding region (bp) | Strand | Protein size (aa) | Putative function                                |
|---------------------------------------------------------|--------------------|--------|-------------------|--------------------------------------------------|
| <b>vB_PbeS_Pben1 of <i>P. bengalensis</i> DSM 17099</b> |                    |        |                   |                                                  |
| <i>pben1_p01</i>                                        | 158-232            | →      | -                 | tRNA <sub>Val</sub> (TAC)                        |
| <i>pben1_p02</i>                                        | 236-1381           | ←      | 381               | integrase; tyrosine recombinase XerC/XerD        |
| <i>pben1_p03</i>                                        | 1371-1643          | ←      | 90                | hypothetical protein                             |
| <i>pben1_p04</i>                                        | 1687-1938          | ←      | 83                | hypothetical protein                             |
| <i>pben1_p05</i>                                        | 1931-2182          | ←      | 83                | hypothetical protein                             |
| <i>pben1_p06</i>                                        | 2182-2889          | ←      | 235               | hypothetical protein                             |
| <i>pben1_p07</i>                                        | 2889-3176          | ←      | 95                | hypothetical protein                             |
| <i>pben1_p08</i>                                        | 3169-3336          | ←      | 55                | hypothetical protein                             |
| <i>pben1_p09</i>                                        | 3329-3724          | ←      | 131               | hypothetical protein                             |
| <i>pben1_p10</i>                                        | 3721-4152          | ←      | 143               | hypothetical protein                             |
| <i>pben1_p11</i>                                        | 4149-4436          | ←      | 95                | hypothetical protein                             |
| <i>pben1_p12</i>                                        | 4503-5354          | ←      | 283               | hypothetical protein                             |
| <i>pben1_p13</i>                                        | 5382-5708          | ←      | 108               | hypothetical protein                             |
| <i>pben1_p14</i>                                        | 5712-5912          | ←      | 66                | hypothetical protein                             |
| <i>pben1_p15</i>                                        | 5909-6106          | ←      | 65                | hypothetical protein                             |
| <i>pben1_p16</i>                                        | 6090-6254          | ←      | 54                | hypothetical protein                             |
| <i>pben1_p17</i>                                        | 6251-6643          | ←      | 130               | hypothetical protein                             |
| <i>pben1_p18</i>                                        | 6640-6906          | ←      | 88                | hypothetical protein                             |
| <i>pben1_p19</i>                                        | 7134-7472          | ←      | 112               | hypothetical protein                             |
| <i>pben1_p20</i>                                        | 7475-7837          | ←      | 120               | CI-like repressor                                |
| <i>pben1_p21</i>                                        | 7935-8183          | →      | 82                | Cro-like protein                                 |
| <i>pben1_p22</i>                                        | 8180-8533          | →      | 117               | hypothetical protein                             |
| <i>pben1_p23</i>                                        | 8533-8685          | →      | 50                | hypothetical protein                             |
| <i>pben1_p24</i>                                        | 8682-9038          | →      | 118               | hypothetical protein                             |
| <i>pben1_p25</i>                                        | 9056-9463          | ←      | 135               | type II toxin-antitoxin, HicB family antitoxin   |
| <i>pben1_p26</i>                                        | 9476-9664          | ←      | 62                | type II toxin-antitoxin, HicA family toxin       |
| <i>pben1_p27</i>                                        | 10058-10291        | →      | 77                | hypothetical protein                             |
| <i>pben1_p28</i>                                        | 9845-10075         | ←      | 76                | hypothetical protein                             |
| <i>pben1_p29</i>                                        | 10288-10989        | →      | 233               | adenine DNA methyltransferase                    |
| <i>pben1_p30</i>                                        | 10986-11183        | →      | 65                | hypothetical protein                             |
| <i>pben1_p31</i>                                        | 11185-11415        | →      | 76                | hypothetical protein                             |
| <i>pben1_p32</i>                                        | 11399-12019        | →      | 206               | putative phage replication protein               |
| <i>pben1_p33</i>                                        | 12266-12835        | →      | 189               | hypothetical protein                             |
| <i>pben1_p34</i>                                        | 12835-13476        | →      | 213               | hypothetical protein                             |
| <i>pben1_p35</i>                                        | 13642-14346        | →      | 240               | hypothetical protein                             |
| <i>pben1_p36</i>                                        | 14481-15167        | →      | 228               | terminase small subunit                          |
| <i>pben1_p37</i>                                        | 15182-17362        | →      | 726               | terminase large subunit                          |
| <i>pben1_p38</i>                                        | 17362-17562        | →      | 66                | hypothetical protein                             |
| <i>pben1_p39</i>                                        | 17564-19063        | →      | 499               | portal protein                                   |
| <i>pben1_p40</i>                                        | 19056-21137        | →      | 693               | putative phage protease and major capsid protein |
| <i>pben1_p41</i>                                        | 21222-21572        | →      | 116               | hypothetical protein                             |
| <i>pben1_p42</i>                                        | 21572-21895        | →      | 107               | hypothetical protein                             |
| <i>pben1_p43</i>                                        | 21898-22320        | →      | 140               | hypothetical protein                             |
| <i>pben1_p44</i>                                        | 22345-22764        | →      | 139               | tail protein                                     |
| <i>pben1_p45</i>                                        | 22767-23102        | →      | 111               | hypothetical protein                             |
| <i>pben1_p46</i>                                        | 23192-23413        | →      | 73                | hypothetical protein                             |
| <i>pben1_p47</i>                                        | 23838-26030        | →      | 730               | tail tape measure protein                        |
| <i>pben1_p48</i>                                        | 26027-26683        | →      | 218               | hypothetical protein                             |
| <i>pben1_p49</i>                                        | 26680-27267        | →      | 195               | hypothetical protein                             |
| <i>pben1_p50</i>                                        | 27539-27787        | →      | 82                | hypothetical protein                             |
| <i>pben1_p51</i>                                        | 27256-27609        | ←      | 117               | hypothetical protein                             |
| <i>pben1_p52</i>                                        | 27806-27991        | →      | 61                | hypothetical protein                             |
| <i>pben1_p53</i>                                        | 28040-28261        | →      | 73                | hypothetical protein                             |
| <i>pben1_p54</i>                                        | 28267-28686        | →      | 139               | hypothetical protein                             |
| <i>pben1_p55</i>                                        | 28673-30850        | →      | 725               | tail fiber protein                               |
| <i>pben1_p56</i>                                        | 30862-31506        | →      | 214               | putative phage holin                             |
| <i>pben1_p57</i>                                        | 31503-33698        | →      | 731               | tail fiber protein                               |
| <i>pben1_p58</i>                                        | 33703-34491        | →      | 262               | hypothetical protein                             |
| <i>pben1_p59</i>                                        | 34566-34940        | →      | 124               | hypothetical protein                             |
| <i>pben1_p60</i>                                        | 34933-35031        | →      | 32                | hypothetical protein                             |

|                  |             |   |     |                                         |
|------------------|-------------|---|-----|-----------------------------------------|
| <i>pben1_p61</i> | 35028-35234 | → | 68  | hypothetical protein                    |
| <i>pben1_p62</i> | 35243-35503 | → | 86  | hypothetical protein                    |
| <i>pben1_p63</i> | 35503-36336 | → | 277 | hypothetical protein                    |
| <i>pben1_p64</i> | 36360-36566 | ← | 68  | hypothetical protein                    |
| <i>pben1_p65</i> | 36625-37044 | ← | 139 | hypothetical protein                    |
| <i>pben1_p66</i> | 37193-37228 | ← | 32  | hypothetical protein                    |
| <i>pben1_p67</i> | 37269-38093 | → | 274 | peptidoglycan-binding protein; lysozyme |
| <i>pben1_p68</i> | 38097-38297 | → | 66  | hypothetical protein                    |
| <i>pben1_p69</i> | 38297-38425 | → | 42  | hypothetical protein                    |
| <i>pben1_p70</i> | 38516-39031 | ← | 171 | hypothetical protein                    |
| <i>pben1_p71</i> | 39117-39242 | → | 41  | hypothetical protein                    |
| <i>pben1_p72</i> | 39545-39766 | → | 73  | hypothetical protein                    |

**vB\_PkoS\_Pkon1 of *P. kondratievae* NCIMB 13773T**

|                  |             |   |     |                                                    |
|------------------|-------------|---|-----|----------------------------------------------------|
| <i>pkon1_p01</i> | 63-1070     | ← | 335 | integrase; tyrosine recombinase XerC/XerD          |
| <i>pkon1_p02</i> | 1067-1231   | ← | 54  | hypothetical protein                               |
| <i>pkon1_p03</i> | 1359-1610   | ← | 83  | hypothetical protein                               |
| <i>pkon1_p04</i> | 1610-1792   | ← | 60  | hypothetical protein                               |
| <i>pkon1_p05</i> | 1792-1983   | ← | 63  | hypothetical protein                               |
| <i>pkon1_p06</i> | 1976-2437   | ← | 153 | hypothetical protein                               |
| <i>pkon1_p07</i> | 2427-3011   | ← | 194 | hypothetical protein                               |
| <i>pkon1_p08</i> | 2998-3342   | ← | 114 | hypothetical protein                               |
| <i>pkon1_p09</i> | 3479-3727   | ← | 82  | hypothetical protein                               |
| <i>pkon1_p10</i> | 3730-4113   | ← | 127 | HNHc endonuclease                                  |
| <i>pkon1_p11</i> | 4110-4610   | ← | 166 | hypothetical protein                               |
| <i>pkon1_p12</i> | 4610-4816   | ← | 68  | hypothetical protein                               |
| <i>pkon1_p13</i> | 5028-5513   | ← | 161 | single-stranded DNA-binding protein (SSB)          |
| <i>pkon1_p14</i> | 5513-6094   | ← | 193 | essential recombination function protein (ERF)     |
| <i>pkon1_p15</i> | 6091-6309   | ← | 72  | hypothetical protein                               |
| <i>pkon1_p16</i> | 6306-6671   | ← | 121 | cysteine-rich zinc finger protein                  |
| <i>pkon1_p17</i> | 6673-6882   | ← | 69  | hypothetical protein                               |
| <i>pkon1_p18</i> | 6879-7058   | ← | 59  | hypothetical protein                               |
| <i>pkon1_p19</i> | 7079-7291   | ← | 70  | hypothetical protein                               |
| <i>pkon1_p20</i> | 7385-7627   | ← | 80  | hypothetical protein                               |
| <i>pkon1_p21</i> | 8455-9183   | ← | 242 | hypothetical protein                               |
| <i>pkon1_p22</i> | 9186-9389   | ← | 67  | hypothetical protein                               |
| <i>pkon1_p23</i> | 9563-9874   | ← | 103 | CI-like repressor                                  |
| <i>pkon1_p24</i> | 9948-10244  | → | 98  | Cro-like protein                                   |
| <i>pkon1_p25</i> | 10241-10450 | → | 69  | hypothetical protein                               |
| <i>pkon1_p26</i> | 10447-10704 | → | 85  | hypothetical protein                               |
| <i>pkon1_p27</i> | 10706-11158 | → | 150 | RusA-like crossover junction endodeoxyribonuclease |
| <i>pkon1_p28</i> | 11207-12592 | → | 461 | DnaB replicative DNA helicase                      |
| <i>pkon1_p29</i> | 12596-13303 | → | 235 | hypothetical protein                               |
| <i>pkon1_p30</i> | 13300-13797 | → | 165 | DNA binding protein                                |
| <i>pkon1_p31</i> | 13794-14009 | → | 71  | NrdH-redoxin; thioredoxin (TRX)-like superfamily   |
| <i>pkon1_p32</i> | 14140-14796 | → | 218 | hypothetical protein                               |
| <i>pkon1_p33</i> | 15230-15745 | → | 171 | terminase small subunit                            |
| <i>pkon1_p34</i> | 15717-17180 | → | 487 | terminase large subunit                            |
| <i>pkon1_p35</i> | 17190-18599 | → | 469 | portal protein                                     |
| <i>pkon1_p36</i> | 18611-19357 | → | 248 | structural protein                                 |
| <i>pkon1_p37</i> | 19454-20443 | → | 329 | major capsid protein                               |
| <i>pkon1_p38</i> | 20436-21302 | → | 288 | hypothetical protein                               |
| <i>pkon1_p39</i> | 21302-21502 | → | 66  | hypothetical protein                               |
| <i>pkon1_p40</i> | 21502-21918 | → | 138 | hypothetical protein                               |
| <i>pkon1_p41</i> | 21918-22268 | → | 116 | hypothetical protein                               |
| <i>pkon1_p42</i> | 22476-23507 | → | 343 | head morphogenesis                                 |
| <i>pkon1_p43</i> | 23508-23849 | ← | 113 | type II toxin-antitoxin system HipB-like antitoxin |
| <i>pkon1_p44</i> | 23862-24113 | ← | 83  | type II toxin-antitoxin system RelE-family toxin   |
| <i>pkon1_p45</i> | 24188-24604 | → | 138 | tail protein                                       |
| <i>pkon1_p46</i> | 24601-25029 | → | 142 | tail terminator                                    |
| <i>pkon1_p47</i> | 25051-25503 | → | 150 | hypothetical protein                               |
| <i>pkon1_p48</i> | 25506-26042 | → | 178 | hypothetical protein                               |
| <i>pkon1_p49</i> | 25898-26311 | → | 137 | hypothetical protein                               |
| <i>pkon1_p50</i> | 26390-27367 | → | 325 | hypothetical protein                               |
| <i>pkon1_p51</i> | 27471-27728 | ← | 85  | Arc-like DNA-binding domain                        |
| <i>pkon1_p52</i> | 27825-28016 | → | 63  | Arc-family transcriptional repressor               |
| <i>pkon1_p53</i> | 28060-28845 | → | 261 | DNA-binding domain (KilA-N) containing protein     |
| <i>pkon1_p54</i> | 28842-29135 | → | 97  | hypothetical protein                               |

|                  |             |   |      |                                                                       |
|------------------|-------------|---|------|-----------------------------------------------------------------------|
| <i>pkon1_p55</i> | 29210-29635 | → | 141  | hypothetical protein                                                  |
| <i>pkon1_p56</i> | 29757-30770 | → | 337  | hypothetical protein                                                  |
| <i>pkon1_p57</i> | 30814-31344 | ← | 176  | peptidoglycan binding domain-containing protein                       |
| <i>pkon1_p58</i> | 31367-33865 | → | 832  | tail length tape measure protein                                      |
| <i>pkon1_p59</i> | 33865-34500 | → | 211  | hypothetical protein                                                  |
| <i>pkon1_p60</i> | 34503-35120 | → | 205  | hypothetical protein                                                  |
| <i>pkon1_p61</i> | 35125-35322 | ← | 84   | hypothetical protein                                                  |
| <i>pkon1_p62</i> | 35294-35548 | → | 65   | hypothetical protein                                                  |
| <i>pkon1_p63</i> | 35641-35898 | → | 85   | hypothetical protein                                                  |
| <i>pkon1_p64</i> | 35895-36323 | → | 142  | hypothetical protein                                                  |
| <i>pkon1_p65</i> | 36327-41894 | → | 1855 | tail protein                                                          |
| <i>pkon1_p66</i> | 41891-42316 | → | 141  | tail assembly chaperone protein                                       |
| <i>pkon1_p67</i> | 42338-42529 | → | 63   | hypothetical protein                                                  |
| <i>pkon1_p68</i> | 42576-42749 | → | 57   | hypothetical protein                                                  |
| <i>pkon1_p69</i> | 42948-43583 | → | 211  | hypothetical protein                                                  |
| <i>pkon1_p70</i> | 43815-44135 | → | 106  | LydA holin superfamily III                                            |
| <i>pkon1_p71</i> | 44143-44355 | ← | 70   | XRE family transcriptional regulator                                  |
| <i>pkon1_p72</i> | 44352-44540 | ← | 62   | hypothetical protein                                                  |
| <i>pkon1_p73</i> | 44681-45313 | → | 210  | N-acetylmuramoyl-L-alanine amidase; peptidoglycan recognition protein |
| <i>pkon1_p74</i> | 45325-45720 | → | 131  | hypothetical protein                                                  |
| <i>pkon1_p75</i> | 45985-46842 | ← | 285  | adenine DNA methyltransferase                                         |
| <i>pkon1_p76</i> | 46835-48154 | ← | 439  | hypothetical protein                                                  |
| <i>pkon1_p77</i> | 48359-48919 | ← | 186  | hypothetical protein                                                  |
| <i>pkon1_p78</i> | 48912-49097 | ← | 61   | hypothetical protein                                                  |
| <i>pkon1_p79</i> | 49354-49617 | ← | 87   | hypothetical protein                                                  |

**vB\_PsuS\_PsuI of *P. sulfuroxidans* JCM 14013T**

|                 |             |   |     |                                                  |
|-----------------|-------------|---|-----|--------------------------------------------------|
| <i>psu1_p01</i> | 77-1165     | ← | 362 | integrase; tyrosine recombinase XerC/XerD        |
| <i>psu1_p02</i> | 1149-1346   | ← | 65  | hypothetical protein                             |
| <i>psu1_p03</i> | 1343-2026   | ← | 227 | hypothetical protein                             |
| <i>psu1_p04</i> | 2026-2253   | ← | 75  | hypothetical protein                             |
| <i>psu1_p05</i> | 2250-2507   | ← | 85  | hypothetical protein                             |
| <i>psu1_p06</i> | 2507-3661   | ← | 384 | DNA polymerase III, beta subunit                 |
| <i>psu1_p07</i> | 3661-4050   | ← | 129 | hypothetical protein                             |
| <i>psu1_p08</i> | 4141-4386   | ← | 81  | hypothetical protein                             |
| <i>psu1_p09</i> | 4383-4622   | ← | 79  | hypothetical protein                             |
| <i>psu1_p10</i> | 4691-4867   | → | 58  | hypothetical protein                             |
| <i>psu1_p11</i> | 4864-5073   | → | 69  | hypothetical protein                             |
| <i>psu1_p12</i> | 5265-5510   | ← | 81  | hypothetical protein                             |
| <i>psu1_p13</i> | 5642-6127   | ← | 161 | hypothetical protein                             |
| <i>psu1_p14</i> | 6129-6578   | ← | 149 | hypothetical protein                             |
| <i>psu1_p15</i> | 6680-6901   | ← | 73  | hypothetical protein                             |
| <i>psu1_p16</i> | 6898-7488   | ← | 196 | hypothetical protein                             |
| <i>psu1_p17</i> | 7650-8042   | ← | 130 | CI-like repressor                                |
| <i>psu1_p18</i> | 8129-8344   | → | 71  | Cro-like protein                                 |
| <i>psu1_p19</i> | 8425-8694   | → | 89  | hypothetical protein                             |
| <i>psu1_p20</i> | 8694-8846   | → | 50  | hypothetical protein                             |
| <i>psu1_p21</i> | 8843-9322   | → | 159 | putative phage replication protein               |
| <i>psu1_p22</i> | 9319-9957   | → | 212 | hypothetical protein                             |
| <i>psu1_p23</i> | 10124-10696 | → | 190 | hypothetical protein                             |
| <i>psu1_p24</i> | 10693-11412 | → | 239 | hypothetical protein                             |
| <i>psu1_p25</i> | 11501-12220 | → | 239 | hypothetical protein                             |
| <i>psu1_p26</i> | 12313-13011 | → | 232 | terminase small subunit                          |
| <i>psu1_p27</i> | 13022-15211 | → | 729 | terminase large subunit                          |
| <i>psu1_p28</i> | 15211-15408 | → | 65  | head-tail connector                              |
| <i>psu1_p29</i> | 15410-16891 | → | 493 | portal protein                                   |
| <i>psu1_p30</i> | 16888-18987 | → | 669 | putative phage protease and major capsid protein |
| <i>psu1_p31</i> | 19068-19418 | → | 116 | scaffolding protein                              |
| <i>psu1_p32</i> | 19418-19756 | → | 112 | hypothetical protein                             |
| <i>psu1_p33</i> | 19753-20175 | → | 140 | hypothetical protein                             |
| <i>psu1_p34</i> | 20199-20618 | → | 139 | tail protein                                     |
| <i>psu1_p35</i> | 20621-20977 | → | 118 | hypothetical protein                             |
| <i>psu1_p36</i> | 21073-21303 | → | 76  | hypothetical protein                             |
| <i>psu1_p37</i> | 21319-23601 | → | 760 | tail tape measure protein                        |
| <i>psu1_p38</i> | 23603-24238 | → | 211 | hypothetical protein                             |
| <i>psu1_p39</i> | 24235-24852 | → | 205 | hypothetical protein                             |
| <i>psu1_p40</i> | 24927-25361 | → | 144 | hypothetical protein                             |

|                  |             |   |      |                         |
|------------------|-------------|---|------|-------------------------|
| <i>psull_p41</i> | 25365-28796 | → | 1143 | tail fiber protein      |
| <i>psull_p42</i> | 28793-29377 | → | 194  | hypothetical protein    |
| <i>psull_p43</i> | 29736-30026 | → | 96   | hypothetical protein    |
| <i>psull_p44</i> | 30287-30550 | → | 87   | hypothetical protein    |
| <i>psull_p45</i> | 30798-31337 | → | 179  | lysozyme                |
| <i>psull_p46</i> | 31339-31578 | → | 79   | hypothetical protein    |
| <i>psull_p47</i> | 31571-31738 | ← | 55   | hypothetical protein    |
| <i>psull_p48</i> | 32013-32210 | ← | 65   | hypothetical protein    |
| <i>psull_p49</i> | 32391-32666 | ← | 91   | hypothetical protein    |
| <i>psull_p50</i> | 32785-32991 | ← | 68   | cold shock protein CspA |
| <i>psull_p51</i> | 34420-34428 | → | 52   | hypothetical protein    |
| <i>psull_p52</i> | 34904-35281 | ← | 126  | hypothetical protein    |
| <i>psull_p53</i> | 35287-35409 | ← | 41   | hypothetical protein    |
| <i>psull_p54</i> | 35406-35579 | ← | 57   | hypothetical protein    |
| <i>psull_p55</i> | 36165-36707 | ← | 54   | hypothetical protein    |
| <i>psull_p56</i> | 36719-37150 | ← | 147  | hypothetical protein    |
| <i>psull_p57</i> | 37147-37575 | ← | 142  | hypothetical protein    |

**vB\_PthS\_PthI of *P. thiocyanatus* JCM 20756**

|                 |             |   |      |                                                                       |
|-----------------|-------------|---|------|-----------------------------------------------------------------------|
| <i>pthi_p01</i> | 42-1142     | ← | 366  | integrase; tyrosine recombinase XerC/XerD                             |
| <i>pthi_p02</i> | 1118-1348   | ← | 76   | excisionase                                                           |
| <i>pthi_p03</i> | 1348-1533   | ← | 61   | hypothetical protein                                                  |
| <i>pthi_p04</i> | 1530-1787   | ← | 85   | hypothetical protein                                                  |
| <i>pthi_p05</i> | 1780-2565   | ← | 261  | hypothetical protein                                                  |
| <i>pthi_p06</i> | 2562-2981   | ← | 139  | hypothetical protein                                                  |
| <i>pthi_p07</i> | 2978-5623   | ← | 881  | helicase                                                              |
| <i>pthi_p08</i> | 5627-6745   | ← | 372  | DNA polymerase III, beta subunit                                      |
| <i>pthi_p09</i> | 6880-7029   | ← | 49   | hypothetical protein                                                  |
| <i>pthi_p10</i> | 7026-7286   | ← | 86   | hypothetical protein                                                  |
| <i>pthi_p11</i> | 7286-7471   | ← | 61   | hypothetical protein                                                  |
| <i>pthi_p12</i> | 7707-8018   | → | 103  | CI-like repressor                                                     |
| <i>pthi_p13</i> | 8118-8414   | → | 98   | Cro-like protein                                                      |
| <i>pthi_p14</i> | 8431-8709   | → | 92   | hypothetical protein                                                  |
| <i>pthi_p15</i> | 8709-8807   | → | 32   | hypothetical protein                                                  |
| <i>pthi_p16</i> | 8808-8969   | → | 53   | hypothetical protein                                                  |
| <i>pthi_p17</i> | 9020-9304   | → | 94   | hypothetical protein                                                  |
| <i>pthi_p18</i> | 9297-9620   | → | 52   | hypothetical protein                                                  |
| <i>pthi_p19</i> | 9620-10759  | → | 379  | topoisomerase-primase domain containing protein                       |
| <i>pthi_p20</i> | 10752-12596 | → | 614  | DNA primase                                                           |
| <i>pthi_p21</i> | 12578-12766 | → | 62   | hypothetical protein                                                  |
| <i>pthi_p22</i> | 12813-13058 | → | 81   | hypothetical protein                                                  |
| <i>pthi_p23</i> | 13055-13813 | → | 252  | hypothetical protein                                                  |
| <i>pthi_p24</i> | 13995-14345 | → | 116  | HNH endonuclease                                                      |
| <i>pthi_p25</i> | 14532-15014 | → | 160  | hypothetical protein                                                  |
| <i>pthi_p26</i> | 15001-16707 | → | 568  | terminase large subunit                                               |
| <i>pthi_p27</i> | 16709-17950 | → | 413  | portal protein                                                        |
| <i>pthi_p28</i> | 17952-18818 | → | 288  | Clp protease; head maturation protease                                |
| <i>pthi_p29</i> | 18820-20034 | → | 404  | major capsid protein                                                  |
| <i>pthi_p30</i> | 20097-20699 | → | 200  | hypothetical protein                                                  |
| <i>pthi_p31</i> | 20696-21055 | → | 119  | head-tail connector protein                                           |
| <i>pthi_p32</i> | 21057-21383 | → | 108  | head-tail adaptor protein                                             |
| <i>pthi_p33</i> | 21383-21949 | → | 188  | tail-component protein                                                |
| <i>pthi_p34</i> | 21953-22339 | → | 128  | hypothetical protein                                                  |
| <i>pthi_p35</i> | 22332-22799 | → | 155  | tail protein                                                          |
| <i>pthi_p36</i> | 22809-23141 | → | 110  | structural protein                                                    |
| <i>pthi_p37</i> | 23138-23431 | → | 97   | hypothetical protein                                                  |
| <i>pthi_p38</i> | 23421-23750 | ← | 109  | hypothetical protein                                                  |
| <i>pthi_p39</i> | 23773-25725 | → | 650  | tail length tape measure protein                                      |
| <i>pthi_p40</i> | 25725-26387 | → | 220  | hypothetical protein                                                  |
| <i>pthi_p41</i> | 26387-26977 | → | 196  | hypothetical protein                                                  |
| <i>pthi_p42</i> | 26959-27360 | → | 133  | hypothetical protein                                                  |
| <i>pthi_p43</i> | 27360-29450 | → | 696  | tail fiber protein                                                    |
| <i>pthi_p44</i> | 29515-33924 | → | 1469 | hypothetical protein                                                  |
| <i>pthi_p45</i> | 34148-35119 | → | 323  | hypothetical protein                                                  |
| <i>pthi_p46</i> | 35197-35523 | → | 108  | putative phage LydA holin                                             |
| <i>pthi_p47</i> | 35767-36186 | ← | 139  | hypothetical protein                                                  |
| <i>pthi_p48</i> | 36411-37043 | → | 210  | N-acetylmuramoyl-L-alanine amidase; peptidoglycan recognition protein |

|                 |             |   |     |                                                 |
|-----------------|-------------|---|-----|-------------------------------------------------|
| <i>pthi_p49</i> | 37054-37449 | → | 131 | hypothetical protein                            |
| <i>pthi_p50</i> | 37565-38767 | → | 400 | DNA polymerase IV; UmuC-like DNA-repair protein |
| <i>pthi_p51</i> | 38839-39159 | → | 106 | hypothetical protein                            |
| <i>pthi_p52</i> | 39183-39455 | → | 90  | hypothetical protein                            |

**vB\_PyeM\_Pyei1 of *P. yeii* CCUG 32053**

|                 |             |   |     |                                                |
|-----------------|-------------|---|-----|------------------------------------------------|
| <i>pyei_p01</i> | 60-1166     | ← | 368 | integrase; tyrosine recombinase XerC/XerD      |
| <i>pyei_p02</i> | 1159-1335   | ← | 58  | hypothetical protein                           |
| <i>pyei_p03</i> | 1335-1718   | ← | 127 | hypothetical protein                           |
| <i>pyei_p04</i> | 1715-1993   | ← | 92  | hypothetical protein                           |
| <i>pyei_p05</i> | 1990-4011   | ← | 673 | DNA (cytosine-5-)-methyltransferase            |
| <i>pyei_p06</i> | 4125-4283   | → | 52  | chaperone protein DnaJ                         |
| <i>pyei_p07</i> | 4292-5035   | ← | 247 | EaA-like protein                               |
| <i>pyei_p08</i> | 5032-6708   | ← | 558 | helicase                                       |
| <i>pyei_p09</i> | 6705-7070   | ← | 121 | endonuclease                                   |
| <i>pyei_p10</i> | 7074-8183   | ← | 369 | DNA polymerase III beta subunit                |
| <i>pyei_p11</i> | 8174-8674   | ← | 166 | hypothetical protein                           |
| <i>pyei_p12</i> | 8857-9012   | ← | 51  | hypothetical protein                           |
| <i>pyei_p13</i> | 9012-9446   | ← | 144 | tellurite resistance protein TerB              |
| <i>pyei_p14</i> | 9595-9714   | ← | 39  | hypothetical protein                           |
| <i>pyei_p15</i> | 9714-10004  | ← | 96  | hypothetical protein                           |
| <i>pyei_p16</i> | 10695-10925 | ← | 76  | hypothetical protein                           |
| <i>pyei_p17</i> | 10922-11164 | ← | 80  | hypothetical protein                           |
| <i>pyei_p18</i> | 11161-11379 | ← | 72  | hypothetical protein                           |
| <i>pyei_p19</i> | 11440-12138 | ← | 232 | CI-like repressor                              |
| <i>pyei_p20</i> | 12190-12387 | → | 65  | hypothetical protein                           |
| <i>pyei_p21</i> | 12387-12551 | → | 54  | hypothetical protein                           |
| <i>pyei_p22</i> | 12548-13126 | → | 192 | hypothetical protein                           |
| <i>pyei_p23</i> | 13123-14067 | → | 314 | replication initiation protein                 |
| <i>pyei_p24</i> | 14120-14833 | → | 237 | DNA-binding protein, antirepressor protein     |
| <i>pyei_p25</i> | 14833-15093 | → | 86  | hypothetical protein                           |
| <i>pyei_p26</i> | 15086-15541 | → | 151 | VRR-NUC domain-containing protein (nuclease)   |
| <i>pyei_p27</i> | 15538-16017 | → | 159 | hypothetical protein                           |
| <i>pyei_p28</i> | 16014-16262 | → | 82  | chaperone protein DnaJ                         |
| <i>pyei_p29</i> | 16252-16899 | → | 215 | hypothetical protein                           |
| <i>pyei_p30</i> | 17187-18419 | → | 410 | signal transduction histidine kinase           |
| <i>pyei_p31</i> | 18918-19505 | → | 195 | hypothetical protein                           |
| <i>pyei_p32</i> | 19682-20257 | → | 191 | terminase small subunit                        |
| <i>pyei_p33</i> | 20226-22076 | → | 616 | terminase large subunit                        |
| <i>pyei_p34</i> | 22073-23701 | → | 542 | portal protein                                 |
| <i>pyei_p35</i> | 23691-23933 | → | 80  | head completion protein                        |
| <i>pyei_p36</i> | 23948-24943 | → | 331 | Clp protease; head maturation protease         |
| <i>pyei_p37</i> | 24956-25324 | → | 122 | head decoration protein D                      |
| <i>pyei_p38</i> | 25328-26365 | → | 345 | major capsid protein                           |
| <i>pyei_p39</i> | 26430-26555 | → | 41  | hypothetical protein                           |
| <i>pyei_p40</i> | 26601-26990 | → | 129 | hypothetical protein                           |
| <i>pyei_p41</i> | 26991-27725 | → | 244 | hypothetical protein                           |
| <i>pyei_p42</i> | 27718-28239 | → | 173 | baseplate assembly protein V                   |
| <i>pyei_p43</i> | 28250-28414 | → | 54  | hypothetical protein                           |
| <i>pyei_p44</i> | 28419-28742 | → | 107 | baseplate assembly protein W                   |
| <i>pyei_p45</i> | 28739-29629 | → | 296 | baseplate assembly protein J                   |
| <i>pyei_p46</i> | 29633-30190 | → | 185 | tail protein                                   |
| <i>pyei_p47</i> | 30190-31164 | → | 324 | tail protein                                   |
| <i>pyei_p48</i> | 31230-32414 | → | 394 | tail sheath monomer protein                    |
| <i>pyei_p49</i> | 32427-32942 | → | 171 | tail tube protein                              |
| <i>pyei_p50</i> | 32939-33247 | → | 102 | tail assembly chaperone protein E              |
| <i>pyei_p51</i> | 33247-33369 | → | 40  | hypothetical protein                           |
| <i>pyei_p52</i> | 33366-33941 | ← | 191 | hypothetical protein                           |
| <i>pyei_p53</i> | 33996-34412 | ← | 138 | Arc-like DNA-binding domain-containing protein |
| <i>pyei_p54</i> | 34517-34693 | → | 58  | Arc-family DNA-binding protein                 |
| <i>pyei_p55</i> | 34767-35591 | → | 274 | DNA-binding protein, antirepressor protein     |
| <i>pyei_p56</i> | 35588-35737 | → | 49  | hypothetical protein                           |
| <i>pyei_p57</i> | 35734-36075 | → | 113 | hypothetical protein                           |
| <i>pyei_p58</i> | 36136-38625 | → | 829 | tail length tape-measure protein               |
| <i>pyei_p59</i> | 38625-39068 | → | 147 | tail protein U                                 |
| <i>pyei_p60</i> | 39065-39274 | → | 69  | tail protein X                                 |
| <i>pyei_p61</i> | 39294-40262 | → | 322 | tail protein D                                 |
| <i>pyei_p62</i> | 40259-40612 | → | 117 | structural protein                             |



|                 |             |   |     |                                                                       |
|-----------------|-------------|---|-----|-----------------------------------------------------------------------|
| <i>pyei_p63</i> | 40616-41557 | → | 313 | hypothetical protein                                                  |
| <i>pyei_p64</i> | 41618-41950 | → | 110 | hypothetical protein                                                  |
| <i>pyei_p65</i> | 41950-43944 | → | 664 | tail fiber protein                                                    |
| <i>pyei_p66</i> | 43944-44798 | → | 284 | hypothetical protein                                                  |
| <i>pyei_p67</i> | 44930-45196 | → | 88  | hypothetical protein                                                  |
| <i>pyei_p68</i> | 45193-45372 | → | 59  | hypothetical protein                                                  |
| <i>pyei_p69</i> | 45363-45758 | → | 131 | hypothetical protein                                                  |
| <i>pyei_p70</i> | 45763-45957 | ← | 64  | hypothetical protein                                                  |
| <i>pyei_p71</i> | 46040-47185 | → | 381 | Ca <sup>2+</sup> ion binding domain containing hemolysin-type protein |
| <i>pyei_p72</i> | 47187-48008 | → | 273 | peptidoglycan-binding protein                                         |
| <i>pyei_p73</i> | 48010-48378 | → | 122 | hypothetical protein                                                  |
| <i>pyei_p74</i> | 48375-48845 | → | 156 | structural protein                                                    |
| <i>pyei_p75</i> | 49435-50052 | → | 205 | SOS response associated peptidase (SRAP)                              |

**Table S2.** Reciprocal identities (%) of proteins encoded within the vB\_PbeS\_Pben1, vB\_PkoS\_Pkon1, vB\_PsuS\_Psul1, vB\_PthS\_Pthi1 and vB\_PyeM\_Pyei1 phages. Thresholds of e-value 1e-10 and query coverage per HSP of 50% were applied.

| Protein (gene) no. within the particular phage | vB_PbeS_Pben1                      | vB_PkoS_Pkon1                      | vB_PsuS_Psul1                                         | vB_PthS_Pthi1                        | vB_PyeM_Pyei1                                         |
|------------------------------------------------|------------------------------------|------------------------------------|-------------------------------------------------------|--------------------------------------|-------------------------------------------------------|
| 1                                              |                                    | pben1_p02 (29%)<br>psul1_p01 (27%) | pben1_p02 (29%)<br>pkon1_p01 (27%)<br>pyei1_p01 (28%) | -                                    | psul1_p01 (28%)                                       |
| 2                                              | pkon1_p01 (29%)<br>psul1_p01 (29%) | -                                  | -                                                     | -                                    | -                                                     |
| 3                                              | -                                  | -                                  | -                                                     | pben1_p08 (79%)                      | pkon1_p09 (82%)<br>psul1_p07 (66%)                    |
| 4                                              | -                                  | -                                  | -                                                     | -                                    | -                                                     |
| 5                                              | -                                  | -                                  | -                                                     | -                                    | -                                                     |
| 6                                              | -                                  | -                                  | pthi1_p08 (45%)<br>pyei1_p10 (47%)                    | psul1_p57 (71%)                      | -                                                     |
| 7                                              | -                                  | -                                  | pkon1_p09 (79%)<br>pyei1_p03 (66%)                    | -                                    | -                                                     |
| 8                                              | pthi1_p03 (79%)                    | -                                  | -                                                     | psul1_p06 (45%)<br>pyei1_p10 (54%)   | -                                                     |
| 9                                              | -                                  | psul1_p07 (79%)<br>pyei1_p03 (82%) | -                                                     | -                                    | -                                                     |
| 10                                             | -                                  | -                                  | -                                                     | -                                    | psul1_p06 (47%)<br>pthi1_p08 (54%)                    |
| 11                                             | -                                  | -                                  | pben1_p65 (65%)<br>pyei1_p70 (56%)                    | Ppkon1_p06 (89%)<br>Ppsul1_p03 (81%) | -                                                     |
| 12                                             | -                                  | -                                  | -                                                     | -                                    | -                                                     |
| 13                                             | -                                  | -                                  | -                                                     | -                                    | -                                                     |
| 14                                             | -                                  | -                                  | -                                                     | -                                    | -                                                     |
| 15                                             | -                                  | -                                  | pyei1_p18 (60%)                                       | -                                    | pben1_p17 (56%)                                       |
| 16                                             | -                                  | -                                  | -                                                     | -                                    | -                                                     |
| 17                                             | -                                  | -                                  | -                                                     | -                                    | -                                                     |
| 18                                             | -                                  | -                                  | -                                                     | -                                    | psul1_p15 (60%)                                       |
| 19                                             | -                                  | -                                  | pben1_p22 (94%)                                       | -                                    | -                                                     |
| 20                                             | -                                  | -                                  | pben1_p23 (73%)                                       | -                                    | -                                                     |
| 21                                             | -                                  | -                                  | -                                                     | -                                    | -                                                     |
| 22                                             | psul1_p19 (94%)                    | -                                  | -                                                     | -                                    | -                                                     |
| 23                                             | psul1_p20 (73%)                    | -                                  | pben1_p33 (29%)                                       | psul1_p24 (44%)                      | -                                                     |
| 24                                             | -                                  | -                                  | pthi1_p23 (41%)                                       | -                                    | -                                                     |
| 25                                             | -                                  | -                                  | pben1_p35 (70%)                                       | -                                    | -                                                     |
| 26                                             | -                                  | -                                  | pben1_p36 (72%)                                       | -                                    | -                                                     |
| 27                                             | -                                  | -                                  | pben1_p37 (79%)<br>pyei1_p33 (24%)                    | -                                    | -                                                     |
| 28                                             | -                                  | -                                  | pben1_p38 (69%)                                       | pyei1_p36 (33%)                      | -                                                     |
| 29                                             | -                                  | -                                  | pben1_p39 (73%)                                       | -                                    | pkon1_p32 (38%)                                       |
| 30                                             | -                                  | -                                  | pben1_p40 (72%)                                       | -                                    | -                                                     |
| 31                                             | -                                  | -                                  | pben1_p41 (80%)                                       | -                                    | -                                                     |
| 32                                             | -                                  | pyei1_p29 (38%)                    | pben1_p42 (63%)                                       | -                                    | -                                                     |
| 33                                             | psul1_p23 (29%)                    | -                                  | pben1_p43 (63%)                                       | -                                    | pben1_p37 (24%)<br>psul1_p27 (24%)                    |
| 34                                             | -                                  | -                                  | pben1_p44 (68%)<br>pthi1_p35 (28%)                    | -                                    | -                                                     |
| 35                                             | psul1_p25 (70%)                    | -                                  | pben1_p45 (50%)                                       | pben1_p44 (27%)<br>psul1_p34 (28%)   | -                                                     |
| 36                                             | psul1_p26 (72%)                    | -                                  | pben1_p46 (49%)                                       | -                                    | pben1_p40 (46%)<br>psul1_p30 (49%)<br>pthi1_p28 (33%) |
| 37                                             | psul1_p27 (79%)<br>pyei1_p33 (24%) | -                                  | pben1_p47 (51%)                                       | -                                    | -                                                     |
| 38                                             | psul1_p28 (69%)                    | -                                  | pkon1_p59 (54%)                                       | -                                    | -                                                     |
| 39                                             | psul1_p29 (73%)                    | -                                  | pkon1_p60 (64%)                                       | psul1_p37 (35%)                      | -                                                     |
| 40                                             | psul1_p30 (72%)                    | -                                  | pkon1_p64 (73%)                                       | -                                    | -                                                     |
| 41                                             | psul1_p31 (80%)                    | -                                  | pkon1_p65 (49%)                                       | -                                    | -                                                     |

|    |                                    |                 |                 |                                    |   |
|----|------------------------------------|-----------------|-----------------|------------------------------------|---|
| 42 | psul1_p32 (63%)                    | -               | -               | -                                  | - |
| 43 | psul1_p33 (63%)                    | -               | -               | pben1_p55 (25%)                    | - |
| 44 | psul1_p34 (68%)<br>pthi1_p35 (27%) | -               | -               | -                                  | - |
| 45 | psul1_p35 (50%)                    | -               | -               | -                                  | - |
| 46 | psul1_p36 (49%)                    | -               | -               | pkon1_p70 (63%)                    | - |
| 47 | psul1_p37 (51%)                    | -               | -               | pben1_p65 (96%)                    | - |
| 48 | -                                  | -               | -               | pkon1_p73 (92%)                    | - |
| 49 | -                                  | -               | -               | pkon1_p74 (73%)                    | - |
| 50 | -                                  | -               | -               | -                                  | - |
| 51 | -                                  | -               | -               | -                                  | - |
| 52 | -                                  | -               | -               | -                                  | - |
| 53 | -                                  | -               | -               | -                                  | - |
| 54 | -                                  | -               | -               | -                                  | - |
| 55 | pthi1_p43 (24%)                    | -               | -               | -                                  | - |
| 56 | -                                  | -               | -               | -                                  | - |
| 57 | -                                  | -               | pthi1_p06 (71%) | -                                  | - |
| 58 | -                                  | -               | -               | -                                  | - |
| 59 | -                                  | psul1_p38 (54%) | -               | -                                  | - |
| 60 | -                                  | psul1_p39 (64%) | -               | -                                  | - |
| 61 | -                                  | -               | -               | -                                  | - |
| 62 | -                                  | -               | -               | -                                  | - |
| 63 | -                                  | -               | -               | -                                  | - |
| 64 | psul1_p11 (65%)<br>pyei1_p70 (56%) | psul1_p40 (73%) | -               | -                                  | - |
| 65 | pthi1_p47 (96%)                    | psul1_p41 (49%) | -               | -                                  | - |
| 66 | -                                  | -               | -               | -                                  | - |
| 67 | pyei1_p72 (74%)                    | -               | -               | -                                  | - |
| 68 | -                                  | -               | -               | -                                  | - |
| 69 | -                                  | -               | -               | -                                  | - |
| 70 | -                                  | pthi1_p46 (63%) | -               | pben1_p64 (56%)<br>psul1_p11 (56%) | - |
| 71 | -                                  | -               | -               | -                                  | - |
| 72 | -                                  | -               | -               | pben1_p67 (74%)                    | - |
| 73 | -                                  | pthi1_p48 (92%) | -               | -                                  | - |
| 74 | -                                  | pthi1_p49 (73%) | -               | -                                  | - |
| 75 | -                                  | -               | -               | -                                  | - |
| 76 | -                                  | -               | -               | -                                  | - |
| 77 | -                                  | -               | -               | -                                  | - |
| 78 | -                                  | -               | -               | -                                  | - |
| 79 | -                                  | -               | -               | -                                  | - |

% of identity is presented in parentheses.

**Table S3.** Putative attachment sites for analyzed *Paracoccus* prophages.

| Host                              | Phage name    | Classification      | Integration strategy | Integration site                                    | Attachment site sequence (5'→3')                                                 |
|-----------------------------------|---------------|---------------------|----------------------|-----------------------------------------------------|----------------------------------------------------------------------------------|
| <i>P. bengalensis</i> DSM 17099   | vB_PbeS_Pben1 |                     | tyr                  | Intergenic region                                   | GCGTCTCGTTTACTGAGA                                                               |
| <i>P. kondratieva</i> NCINM 13773 | vB_PkoS_Pkon1 | <i>Siphoviridae</i> | tyr                  | Gene encoding OmpR family transcriptional regulator | GTTTCTCAA(G/C)CAT                                                                |
| <i>P. sulfuroxidans</i> JCM 14013 | vB_PsuS_Psul1 |                     | tyr                  | tRNA-Trp(CCA)                                       | CGGTCTCCAAAACCGAGGGTCTGGGTTTCGAGTC<br>CCCCAACCCCTGCCAGT                          |
| <i>P. thiocyanatus</i> JCM 20756  | vB_PthS_Pthi1 |                     | tyr                  | tRNA-Ser(GGA)                                       | CCTCACCGTCCGCCA                                                                  |
| <i>P. yeei</i> CCUG32053          | vB_PyeM_Pyei1 | <i>Myoviridae</i>   | tyr                  | tRNA-Pro(TGG)                                       | GACGGTTTTGGGTACCGTAGCCGGAGGTTCGA<br>ATCCTCTCGCCCCGACCAG                          |
| <i>P. marcusii</i>                | vB_PmaS_IMEP1 | <i>Siphoviridae</i> | N/A                  |                                                     |                                                                                  |
| <i>P. marinus</i>                 | vB_PmaS_Spha  |                     | N/A                  |                                                     |                                                                                  |
| <i>P. aminophilus</i> JCM 7686    | vB_PamS_Pami1 | <i>Siphoviridae</i> | tyr                  | tRNA-Pro(TGG)                                       | CGGTTTTGGGTACCGTAGCCGGAGGTTCGAATC<br>CTCTCGCCCCGACCACAATTAGC                     |
|                                   | vB_PamS_Pami2 |                     | tyr                  | intergenic                                          | TCAGCGTCTCCGGC                                                                   |
|                                   | vB_PamS_Pami3 |                     | tyr                  | tRNA-Arg(CCG)                                       | GGCGCACC(G/C)AAGA                                                                |
|                                   | vB_PamS_Pami4 |                     | tyr                  | partial lyase protein                               | TAATGAGAACATCTGGCCG                                                              |
|                                   | vB_PamS_Pami5 |                     | tyr                  | tRNA-Gly(TCC)                                       | AGCCTTCCAAGCTGAATACGTGGGTTTCGATTCCC<br>ATCACCCGCTCCAA                            |
|                                   | vB_PamS_Pami6 |                     | ser                  | tRNA-Met(CAT)                                       | TCGGGTGGGAAAATGGTAGCGGAGGAGGGTTT                                                 |
| <i>P. aminovorans</i> DSM 8537    | vB_PamS_PD1   |                     | ser                  | not identified                                      | not identified                                                                   |
| <i>P. aminovorans</i> HPD-2       | vB_PamP_PD2   | <i>Podoviridae</i>  | tyr                  | tRNA-Thr(CTG)                                       | CGAGTCCCTTACC GGCCACCA                                                           |
|                                   | vB_PamS_PD3   |                     | ser                  | not identified                                      | not identified                                                                   |
| <i>P. contaminans</i> RKI         | vB_PcoS_PD4   | <i>Siphoviridae</i> | tyr                  | tRNA-Met(CAT)                                       | TTGGTTGCGGGGCGAGGATTGAACCTACGACC<br>TTCAGTTATGAGGCT                              |
|                                   | vB_PcoS_PD5   |                     | tyr                  | tRNA-Met(CAT)                                       | CTAAGCCTTTGATATCTTGTATGAAGATTGGTT<br>GCGGGGCGAGGATTGAACCTGCGGCCCTCAGG<br>TTATGAG |
|                                   | vB_PcoS_PD6   |                     | ser                  | not identified                                      | not identified                                                                   |
|                                   | vB_PcoS_PD7   |                     | ser                  | not identified                                      | not identified                                                                   |
| <i>P. denitrificans</i> DSM 413   | vB_PdeP_PD8   | <i>Podoviridae</i>  | tyr                  | tRNA-Thr(TGT)                                       | ATGGTGCCGGTTGCAGGAATCGAACCCGCGACC<br>TTCTGATTACAAATCAG                           |
| <i>P. denitrificans</i> DSM 415   | vB_PdeP_PD9   |                     | tyr                  | tRNA-Thr(TGT)                                       | ATGGCGCCGGTTGCAGGAATCGAACCCGCGACC<br>TTCTGATTACAAATCAG                           |
| <i>P. denitrificans</i> ISTD01    | vB_PdeS_PD10  | <i>Siphoviridae</i> | tyr                  | tRNA-Arg(TCT)                                       | CTGGCGGGGTCGCCATTTATCAAAAAAT                                                     |
| <i>P. denitrificans</i> PD1222    | vB_PdeS_PD11  |                     | tyr                  | tRNA-Ser(GCT)                                       | GCAGCGGAGACGTGGCCGAGTGGTTCGAAGGCAC<br>ACCCCTGCTAAG                               |
|                                   | vB_PdeP_PD12  | <i>Podoviridae</i>  | tyr                  | tRNA-Thr(TGT)                                       | CTGATTTGTAATCAGAAGGTCGCGGGTTCGATTC<br>CTGCAACCGGCGCCAT                           |
| <i>P. homiensis</i> DSM 17862     | vB_PhoS_PD13  | <i>Siphoviridae</i> | ser                  | not identified                                      | not identified                                                                   |
| <i>P. pantotrophus</i> DSM 1403   | vB_PpaP_PD14  | <i>Podoviridae</i>  | tyr                  | tRNA-Arg(CTT)                                       | AACCTGCCCTTAGGAGGGG                                                              |
| <i>P. pantotrophus</i> J46 J46    | vB_PpaP_PD15  |                     | tyr                  | putative ompR regulator                             | GTTCTGAACCATCTTTACGGCG                                                           |
| <i>P. saliphilus</i> DSM 18447    | vB_PsaS_PD16  |                     | tyr                  | tRNA-Gly(GCC)                                       | TGGAGCGGGCGATGGGATACGATCAGACGA                                                   |
| <i>P. sanguinis</i> 10990         | vB_PsaS_PD17  |                     | tyr                  | not identified                                      | not identified                                                                   |
| <i>P. sanguinis</i> 39524         | vB_PsaS_PD18  |                     | tnp                  | not identified                                      | not identified                                                                   |
|                                   | vB_PsaS_PD19  |                     | tnp                  | not identified                                      | not identified                                                                   |
|                                   | vB_PsaS_PD20  |                     | ser                  | not identified                                      | not identified                                                                   |
| <i>P. sanguinis</i> 4681          | vB_PsaS_PD21  | <i>Siphoviridae</i> | tyr                  | not identified                                      | not identified                                                                   |
|                                   | vB_PsaS_PD22  |                     | tyr                  | tRNA-Phe(GAA)                                       | TGGTGCCCGGAGGCGGATTTCGAAC                                                        |
| <i>P. sanguinis</i> 5503          | vB_PsaS_PD23  |                     | ser                  | not identified                                      | not identified                                                                   |
|                                   | vB_PsaS_PD24  |                     | tyr                  | tRNA-Met(CAT)                                       | TTGGTTGCGGGATAGGATTGAACCTATGACC<br>TTCAGTTATGAGCC                                |
|                                   | vB_PsaS_PD25  |                     | tyr                  | not identified                                      | not identified                                                                   |

|                                    |              |                     |     |                |                                                                                                                  |
|------------------------------------|--------------|---------------------|-----|----------------|------------------------------------------------------------------------------------------------------------------|
|                                    | vB_PsaS_PD26 |                     | tnp | not identified | not identified                                                                                                   |
|                                    | vB_PsaS_PD27 |                     | tnp | not identified | not identified                                                                                                   |
| <i>P. sanguinis</i> DSM 29303      | vB_PsaS_PD28 |                     | tnp | not identified | not identified                                                                                                   |
|                                    | vB_PsaS_PD29 |                     | tyr | tRNA-Met(CAT)  | GTTTTGTACGCGTTATCAAACGCTTACACGCCGCCTCCGGGGCGGC                                                                   |
| <i>P. sediminis</i> DSM 26170      | vB_PseS_PD30 |                     | tyr | tRNA-Met(CAT)  | GGCTCATAACCTGAAGG(T/C)C(A/G)CAGGTTCAAATCCTG(T/C)CCCCGAACCAAAAT                                                   |
| <i>P. solventivorans</i> DSM 6637  | vB_PsoS_PD31 |                     | ser | not identified | not identified                                                                                                   |
| <i>Paracoccus</i> sp. BM15         | vB_PspS_PD32 |                     | tyr | tRNA-Met(CAT)  | TTTTTTGGTTGCGGGGGT(A/T)GGATTTGAACC(T/A)ACGACCTTCAGGTTATGAGCC                                                     |
|                                    | vB_PspS_PD33 |                     | tyr | tRNA-Met(CAT)  | TTTTGGTTGCGGGGG(T/C)AGGATTTGAACCT(A/G)CGACCTTCAGGTTATGAGCC                                                       |
| <i>Paracoccus</i> sp. CBA4604      | vB_PspS_PD34 |                     | ser | not identified | not identified                                                                                                   |
|                                    | vB_PspS_PD35 |                     | ser | not identified | not identified                                                                                                   |
|                                    | vB_PspS_PD36 |                     | tyr | tRNA-Met(CAT)  | AGGCTCATAACCTGAAGGTCACAGGTTCAAATCCGTGCCCCGAACCAAAATAC                                                            |
| <i>Paracoccus</i> sp. J39          | vB_PspS_PD37 | <i>Siphoviridae</i> | tyr | dusA           | TGTCC(G/C)(T/G)(C/A)(C/A)AGTCCATCATCGG(G/C)GCAACGGACAGC(A/C)(TG)GGTTTTGGGTACCGTAGGCCGGAGGTTCAATCC TCTCGCCCCGACCA |
| <i>Paracoccus</i> sp. N5           | vB_PspS_PD38 |                     | tyr | tRNA-Pro(TGG)  |                                                                                                                  |
| <i>Paracoccus</i> sp. S4493        | vB_PspS_PD39 |                     | tyr | tRNA-Gly(CCC)  | TGGAGCGGGTGAAGGGAATCGAACCCTCGTCGT AAGCTTGGGAAGC                                                                  |
|                                    | vB_PspS_PD40 |                     | tyr | intergenic     | GTCCTGCCGGGCCTACCA                                                                                               |
|                                    | vB_PspP_PD41 | <i>Podoviridae</i>  | tyr | tRNA-Thr(GGT)  | CCCTTGGAAGGGTGAGGTCGAGAGTTCAATCCTCTCTCACAGCACCA                                                                  |
| <i>Paracoccus</i> sp. SCN 68-21    | vB_PspS_PD42 | <i>Siphoviridae</i> | tyr | tRNA-Cys(GCA)  | GGATTGCAAATCCGTAAGACCGGTTTCGATTCCGGTACCACCTCCA                                                                   |
|                                    | vB_PspP_PD43 | <i>Podoviridae</i>  | tyr | tRNA-Lys(CAA)  | CGGATTCAAATCCGTTTCAGCGATGAGTGCCCGTTCGAGTCCGGCCGCCCTACCACGCTCTTTC CCCCTACGGGTGCCACT                               |
|                                    | vB_PspS_PD44 |                     | tyr | tRNA-Gln(TTC)  |                                                                                                                  |
| <i>P. sphaerophysae</i> HAMB1 3106 | vB_PspS_PD45 |                     | tyr | tRNA-Met(CAT)  | CTCATAACCTGAAGGTCACAGGTTCAAATCCTGT CCCCGAACCAAAA                                                                 |
| <i>P. versutus</i> DSM 582         | vB_PyeS_PD46 | <i>Siphoviridae</i> | ser | not identified | not identified                                                                                                   |
|                                    | vB_PyeS_PD47 |                     | tyr | intergenic     | GCGCGCCGCCT                                                                                                      |
| <i>P. yeii</i> ATCC BAA-599        | vB_PyeS_PD48 |                     | ser | not identified | not identified                                                                                                   |
|                                    | vB_PyeS_PD49 |                     | tyr | tRNA-Met(CAT)  | TTTTTGGTTGCGGGGGCAGGATTTGAACCTGCGG CCTTCAGGTTATGAGCC                                                             |
|                                    | vB_PyeM_PD50 | <i>Myoviridae</i>   | tyr | tRNA-Pro(TGG)  | GACGGTTTTGGGTACCGTAGGCCGGAGGTTCTGATCCTCTCGCCCCGACCAGT(A/-)CT(T/C)AGC(T/-)(A/-)TTCGCC                             |
| <i>P. yeii</i> TT13                | vB_PyeS_PD51 | <i>Siphoviridae</i> | tyr | tRNA-Asn(GTT)  | GCTGAG(T/C)T(T/-)GGCTCCGGCGGTAGGATCGAACCTACGACCAATTGATTAACAGTCAACTG(A/C)(G/T)(A/C)TACCG                          |
|                                    | vB_PyeS_PD52 |                     | ser | not identified | not identified                                                                                                   |
|                                    | vB_PyeS_PD53 |                     | ser | not identified | not identified                                                                                                   |

**Table S4.** Characteristics of 66 (pro)phages of *Paracoccus* spp. In integration strategy column, values “tyr”, “ser” and “tnp” refer to tyrosine recombinase, serine recombinase and Mu-like transposase, respectively. Information about the status of particular phage proteins, whether they were identified (“present”, “fused”, their specificity or function) or not (“-”) was shown and followed with the corresponding accession number of the protein or locus tag (if accession number is not available).

| Host                                 | Phage name    | Integration strategy | Genome size (bp) | % GC | No. of genes | Repressor              | Cro-like protein    | Protease               | Major capsid protein   | Endolysin                                         | Holin                            | MTases                                                           | RMs | Toxin-antitoxin systems/Heavy metal metabolism genes      |
|--------------------------------------|---------------|----------------------|------------------|------|--------------|------------------------|---------------------|------------------------|------------------------|---------------------------------------------------|----------------------------------|------------------------------------------------------------------|-----|-----------------------------------------------------------|
| <i>P. bengalensis</i><br>DSM 17099   | vB_PbeS_Pben1 | tyr                  | 39,879           | 64.3 | 73           | present (AZV00177)     | present (AZV00178)  | fused (AZV00197)       |                        | lysozyme (AZV00224)                               | putative (AZV00213)              | m <sup>4</sup> C/m <sup>6</sup> A (AZV00186)                     | -   | type II toxin-antitoxin HicAB family (AZV00182, AZV00183) |
| <i>P. kondratieva</i><br>NCINM 13773 | vB_PkoS_Pkon1 | tyr                  | 49,723           | 60.7 | 82           | present (AZV00252)     | present (AZV00253)  | present (AZV00265)     | present (AZV00266)     | N-acetylmuramoyl-L-alanine amidase (AZV00302)     | holin superfamily III (AZV00299) | m <sup>4</sup> C/m <sup>6</sup> A (AZV00304)                     | -   | type II toxin-antitoxin RelBE family (AZV00272, AZV00273) |
| <i>P. sulfuroxidans</i><br>JCM 14013 | vB_PsuS_Psul1 | tyr                  | 37,901           | 60.9 | 62           | present (AZV00325)     | putative (AZV00326) | fused (AZV00338)       |                        | lysozyme (AZV00353)                               | putative (AZV00351)              | -                                                                | -   | -                                                         |
| <i>P. thiocyanatus</i><br>JCM 20756  | vB_PthS_Pthi1 | tyr                  | 39,547           | 63.8 | 54           | putative (AZV00377)    | present (AZV00378)  | present (AZV00393)     | present (AZV00394)     | N-acetylmuramoyl-L-alanine amidase (AZV00413)     | present (AZV00411)               | -                                                                | -   | -                                                         |
| <i>P. yeii</i><br>CCUG32053          | vB_PyeM_Pyei1 | tyr                  | 50,161           | 65.4 | 73           | present (AZV00436)     | -                   | present (AZV00453)     | present (AZV00455)     | PGBP (AZV00489)                                   | putative (AZV00490)              | m <sup>5</sup> C (AZV00422)                                      | -   | tellurite resistance protein TerB (AZV00430)              |
| <i>P. marcusii</i>                   | vB_PmaS_IMEP1 | N/A                  | 38,261           | 64.7 | 52           | not applicable         | not applicable      | present (AJD83161)     | present (AJD83163)     | d-alanyl-d-alanine carboxypeptidase (AJD83154)    | -                                | -                                                                | -   | -                                                         |
| <i>P. marinus</i>                    | vB_PmaS_Shpa  | N/A                  | 42,093           | 56.4 | 56           | not applicable         | not applicable      | present (AKG94516)     | present (AKG94517)     | N-acetylmuramoyl-L-alanine amidase (AKG94538)     | -                                | -                                                                | -   | -                                                         |
| <i>P. aminophilus</i><br>JCM 7686    | vB_PamS_Pami1 | tyr                  | 43,882           | 61.6 | 57           | present (WP_041527566) | -                   | fused (WP_020949540)   |                        | N-acetylmuramoyl-L-alanine amidase (WP_041527568) | putative (WP_020949552)          | m <sup>5</sup> C (WP_020949520), m <sup>4</sup> C (WP_020949563) | -   | tellurite resistance protein TerB (WP_020949524)          |
|                                      | vB_PamS_Pami2 | tyr                  | 37,658           | 60.8 | 51           | putative (pami2_p01)   | -                   | present (WP_020949981) | present (WP_020949982) | N-acetylmuramoyl-L-alanine amidase (WP_041527644) | -                                | m <sup>6</sup> A (WP_020949973)                                  | -   | -                                                         |
|                                      | vB_PamS_Pami3 | tyr                  | 35,083           | 61.9 | 53           | present (WP_041527269) | present (pami3_p41) | present (WP_020949981) | present (WP_020949982) | N-acetylmuramoyl-L-alanine amidase (WP_041527801) | -                                | -                                                                | -   | -                                                         |
|                                      | vB_PamS_Pami4 | tyr                  | 48,068           | 60.4 | 63           | present (pami4_p52)    | -                   | present (WP_041527304) | present (WP_020950959) | N-acetylmuramoyl-L-alanine                        | -                                | m <sup>6</sup> A (WP_020952168)                                  | -   | -                                                         |

|                                    |               |     |        |      |    |                                |                                |                                |                                |                                                                |                                |                                                                                                                                                    |                                       |                                                    |
|------------------------------------|---------------|-----|--------|------|----|--------------------------------|--------------------------------|--------------------------------|--------------------------------|----------------------------------------------------------------|--------------------------------|----------------------------------------------------------------------------------------------------------------------------------------------------|---------------------------------------|----------------------------------------------------|
|                                    |               |     |        |      |    |                                |                                |                                | amidase<br>(WP_041527846)      |                                                                |                                |                                                                                                                                                    |                                       |                                                    |
|                                    | vB_PamS_Pami5 | tyr | 43,256 | 61.0 | 59 | putative<br>(pami5_p50)        | -                              | present<br>(WP_0209499<br>81)  | present<br>(WP_0209499<br>82)  | N-<br>acetylmuramyl-<br>L-alanine<br>amidase<br>(WP_041527914) | -                              | m <sup>5</sup> C<br>(WP_020951349)                                                                                                                 | -                                     | -                                                  |
|                                    | vB_PamS_Pami6 | ser | 38,779 | 61.6 | 57 | -                              | -                              | present<br>(WP_0415273<br>04)  | present<br>(WP_0209509<br>59)  | N-<br>acetylmuramyl-<br>L-alanine<br>amidase<br>(WP_041527973) | putative<br>(WP_0209516<br>03) | m <sup>6</sup> A<br>(WP_020951613)                                                                                                                 | -                                     | -                                                  |
| <i>P. aminovorans</i><br>DSM 8537  | vB_PamS_PD1   | ser | 46,846 | 66.9 | 53 | -                              | -                              | fused (WP_062563780)           |                                | muramidase<br>(WP_062563501)                                   | -                              | m <sup>5</sup> C<br>(WP_074969511),<br>m <sup>4</sup> C/m <sup>6</sup> A<br>(WP_062563481)                                                         | -                                     | -                                                  |
| <i>P. aminovorans</i><br>HPD-2     | vB_PamP_PD2   | tyr | 42,749 | 63.7 | 80 | present<br>(WP_0625621<br>75)  | present<br>(pd2_p27)           | -                              | putative<br>(WP_0625603<br>58) | chitinase<br>(WP_062560378)                                    | putative<br>(WP_0625603<br>76) | -                                                                                                                                                  | -                                     | -                                                  |
|                                    | vB_PamS_PD3   | ser | 41,904 | 67.7 | 48 | -                              | -                              | fused (WP_062563780)           |                                | muramidase<br>(WP_062563501)                                   | putative<br>(WP_0625635<br>00) | m <sup>4</sup> C/m <sup>6</sup> A<br>(WP_062563481),<br>m <sup>5</sup> C<br>(WP_062563483)                                                         | -                                     | -                                                  |
| <i>P. contaminans</i><br>RKI       | vB_PcoS_PD4   | tyr | 43,069 | 65.1 | 47 | -                              | putative<br>(WP_0853787<br>04) | fused (WP_085376815)           |                                | muramidase<br>(WP_085376825)                                   | putative<br>(WP_0853768<br>24) | m <sup>4</sup> C/m <sup>6</sup> A<br>(WP_081962489),<br>m <sup>5</sup> C<br>(WP_081962487),<br>m <sup>4</sup> C/m <sup>6</sup> A<br>(WP_085376809) | Type<br>IIG<br>(WP_0<br>853768<br>03) | -                                                  |
|                                    | vB_PcoS_PD5   | tyr | 61,208 | 65.2 | 54 | present<br>(WP_0853772<br>76)  | putative<br>(WP_0711669<br>86) | fused (WP_085378766)           |                                | muramidase<br>(WP_085377247)                                   | -                              | m <sup>5</sup> C (pd5_p37),<br>m <sup>4</sup> C/m <sup>6</sup> A<br>(WP_085377265)                                                                 | Type<br>IIG<br>(WP_0<br>853772<br>40) | -                                                  |
|                                    | vB_PcoS_PD6   | ser | 41,102 | 68.5 | 50 | -                              | -                              | present<br>(WP_0525127<br>89)  | present<br>(WP_0431302<br>39)  | M15 peptidase<br>(WP_036700213)                                | -                              | m <sup>4</sup> C/m <sup>6</sup> A<br>(WP_085378397),<br>m <sup>5</sup> C<br>(WP_085378398)                                                         | -                                     | arsenite resistance protein<br>ArsB (WP_043130246) |
|                                    | vB_PcoS_PD7   | ser | 51,188 | 68.2 | 58 | present<br>(WP_0853784<br>15)  | putative<br>(WP_0853784<br>17) | present<br>(WP_0853789<br>32)  | present<br>(WP_0853784<br>41)  | M15 peptidase<br>(WP_085378460)                                | -                              | m <sup>4</sup> C/m <sup>6</sup> A<br>(WP_085378430),<br>m <sup>5</sup> C<br>(WP_085378431)                                                         | -                                     | -                                                  |
| <i>P. denitrificans</i><br>DSM 413 | vB_PdeP_PD8   | tyr | 43,858 | 64.6 | 73 | putative<br>(WP_0415303<br>94) | -                              | putative<br>(WP_0117499<br>96) | present<br>(WP_0117499<br>97)  | chitinase<br>(WP_074810605)                                    | putative<br>(WP_0117500<br>14) | -                                                                                                                                                  | -                                     | -                                                  |
| <i>P. denitrificans</i><br>DSM 415 | vB_PdeP_PD9   | tyr | 43,779 | 64.6 | 73 | putative<br>(WP_0415303<br>94) | -                              | putative<br>(WP_0117499<br>96) | present<br>(WP_0117499<br>97)  | chitinase<br>(WP_074988179)                                    | putative<br>(WP_0117500<br>14) | -                                                                                                                                                  | -                                     | -                                                  |
| <i>P. denitrificans</i><br>ISTOD1  | vB_PdeS_PD10  | tyr | 41,212 | 65.1 | 61 | present<br>(WP_1044920)        | putative<br>(WP_1044920)       | fused (WP_104492038)           |                                | N-<br>acetylmuramyl-<br>L-alanine<br>amidase<br>(WP_041527846) | putative<br>(WP_1044920)       | m <sup>5</sup> C<br>(WP_104491978)                                                                                                                 | -                                     | -                                                  |

|                                    |              |     |        |      |    |                                |                                |                               |                               |                                                                      |                                |                                                                                                                                                      |                                                             |                                                                  |
|------------------------------------|--------------|-----|--------|------|----|--------------------------------|--------------------------------|-------------------------------|-------------------------------|----------------------------------------------------------------------|--------------------------------|------------------------------------------------------------------------------------------------------------------------------------------------------|-------------------------------------------------------------|------------------------------------------------------------------|
|                                    |              |     |        |      |    | 06)                            | 08)                            |                               |                               | L-alanine<br>amidase<br>(WP_104492072<br>)                           | 70)                            |                                                                                                                                                      |                                                             |                                                                  |
| <i>P. denitrificans</i><br>PD1222  | vB_PdeS_PD11 | tyr | 42,731 | 64.4 | 61 | putative<br>(WP_0415297<br>26) | -                              | present<br>(WP_0117467<br>08) | present<br>(WP_0117467<br>09) | N-<br>acetylmuramylol-<br>L-alanine<br>amidase<br>(WP_041529737<br>) | -                              | m <sup>4</sup> C/m <sup>6</sup> A<br>(WP_011746688)                                                                                                  | -                                                           | -                                                                |
|                                    | vB_PdeP_PD12 | tyr | 43,827 | 64.6 | 75 | putative<br>(WP_0415303<br>94) | putative<br>(WP_0415303<br>95) | present<br>(WP_0117499<br>96) | present<br>(WP_0117499<br>97) | chitinase<br>(WP_011750015<br>)                                      | putative<br>(WP_0117500<br>14) | -                                                                                                                                                    | -                                                           | -                                                                |
| <i>P. homiensis</i><br>DSM 17862   | vB_PhoS_PD13 | ser | 44,822 | 67.7 | 56 | -                              | -                              | fused (WP_090735001)          |                               | muramidase<br>(WP_090735019<br>)                                     | -                              | m <sup>4</sup> C/m <sup>6</sup> A<br>(WP_090734988)                                                                                                  | -                                                           | zinc/cadmium/lead-<br>transporting ATPase ZntA<br>(WP_090735031) |
| <i>P. pantotrophus</i><br>DSM 1403 | vB_PpaP_PD14 | tyr | 38,850 | 62.9 | 74 | putative<br>(WP_0724615<br>11) | putative<br>(pd14_p47)         | -                             | present<br>(WP_0724614<br>92) | -                                                                    | putative<br>(WP_0724614<br>79) | m <sup>5</sup> C<br>(WP_072461501)                                                                                                                   | -                                                           | -                                                                |
| <i>P. pantotrophus</i><br>J46 J46  | vB_PpaP_PD15 | tyr | 42,547 | 61.9 | 72 | putative<br>(WP_0514198<br>80) | -                              | -                             | present<br>(WP_0287110<br>62) | N-<br>acetylmuramidase<br>(WP_028711075<br>)                         | putative<br>(WP_0367659<br>89) | m <sup>4</sup> C/m <sup>6</sup> A<br>(WP_028711054)                                                                                                  | -                                                           | -                                                                |
| <i>P. saliphilus</i><br>DSM 18447  | vB_PsaS_PD16 | tyr | 45,275 | 59.5 | 55 | putative<br>(WP_0765269<br>67) | -                              | fused (WP_076526980)          |                               | muramidase<br>(WP_076526997<br>)                                     | putative<br>(WP_0765270<br>97) | m <sup>4</sup> C/m <sup>6</sup> A<br>(WP_076526959)                                                                                                  | -                                                           | -                                                                |
| <i>P. sanguinis</i><br>10990       | vB_PsaS_PD17 | tyr | 52,526 | 64.2 | 59 | -                              | putative<br>(WP_0521716<br>51) | present<br>(WP_0367003<br>79) | present<br>(WP_0367003<br>77) | M15 peptidase<br>(WP_036700345<br>)                                  | putative<br>(WP_0367003<br>46) | m <sup>4</sup> C/m <sup>6</sup> A<br>(WP_036700391),<br>m <sup>4</sup> C/m <sup>6</sup> A<br>(WP_036700393),<br>m <sup>5</sup> C<br>(WP_036700407)   | type III<br>(WP_0<br>367003<br>99,<br>WP_03<br>670040<br>1) | -                                                                |
| <i>P. sanguinis</i><br>39524       | vB_PsaS_PD18 | tnp | 41,698 | 68.5 | 60 | present<br>(WP_0521761<br>00)  | -                              | present<br>(WP_0367306<br>05) | present<br>(WP_0367306<br>01) | N-<br>acetylmuramylol-<br>L-alanine<br>amidase<br>(WP_036730626<br>) | -                              | m <sup>4</sup> C/m <sup>6</sup> A<br>(WP_052176079.1)                                                                                                | -                                                           | -                                                                |
|                                    | vB_PsaS_PD19 | tnp | 39,502 | 68.6 | 53 | present<br>(WP_0521762<br>19)  | -                              | present<br>(WP_0367316<br>16) | present<br>(WP_0367316<br>18) | N-<br>acetylmuramylol-<br>L-alanine<br>amidase<br>(WP_036731608<br>) | -                              | m <sup>4</sup> C/m <sup>6</sup> A<br>(WP_036731591)                                                                                                  | -                                                           | -                                                                |
| <i>P. sanguinis</i><br>4681        | vB_PsaS_PD20 | ser | 41,827 | 68.4 | 48 | -                              | -                              | present<br>(WP_0525127<br>89) | present<br>(WP_0431302<br>39) | M15 peptidase<br>(WP_036700213<br>)                                  | putative<br>(WP_0367002<br>15) | m <sup>4</sup> C/m <sup>6</sup> A<br>(WP_043130228),<br>m <sup>5</sup> C<br>(WP_043130230)                                                           | -                                                           | arsenite resistance protein<br>ArsB (WP_043130246)               |
|                                    | vB_PsaS_PD21 | tyr | 38,594 | 65.3 | 46 | -                              | putative<br>(WP_0431324<br>59) | fused (WP_043132429)          |                               | muramidase<br>(WP_043132468<br>)                                     | putative<br>(WP_0431324<br>52) | m <sup>4</sup> C/m <sup>6</sup> A<br>(IX54_RS07405) ,<br>m <sup>5</sup> C<br>(WP_043132412),<br>m <sup>4</sup> C/m <sup>6</sup> A<br>(WP_043132414 ) | -                                                           | -                                                                |
| <i>P. sanguinis</i><br>5503        | vB_PsaS_PD22 | tyr | 53,314 | 66.0 | 59 | -                              | putative<br>(WP_0367063)       | present<br>(WP_0367063)       | present<br>(WP_0521747)       | N-<br>acetylmuramidase                                               | putative<br>(WP_0367062)       | m <sup>4</sup> C/m <sup>6</sup> A<br>(WP_036706381)                                                                                                  | type<br>IIG                                                 | -                                                                |



|                                  |              |     |        |      |    |                               |                                |                               |                                     |                                                                             |                                                                                                                                                |                                                                                                                                             |                                                                                        |                                                                                    |
|----------------------------------|--------------|-----|--------|------|----|-------------------------------|--------------------------------|-------------------------------|-------------------------------------|-----------------------------------------------------------------------------|------------------------------------------------------------------------------------------------------------------------------------------------|---------------------------------------------------------------------------------------------------------------------------------------------|----------------------------------------------------------------------------------------|------------------------------------------------------------------------------------|
|                                  |              |     |        |      |    | 20)                           | 12)                            | 28)                           | e<br>(WP_052174723<br>)             | 68)                                                                         |                                                                                                                                                | (WP_0<br>367062<br>48)                                                                                                                      |                                                                                        |                                                                                    |
|                                  |              |     |        |      |    |                               |                                |                               |                                     |                                                                             |                                                                                                                                                | type I<br>(WP_0<br>367066<br>19,<br>WP_03<br>670662<br>2,<br>WP_08<br>196246<br>4,<br>WP_03<br>670662<br>7)                                 | multidrug efflux system<br>AcrABC<br>(WP_052174753 -<br>WP_052174754,<br>WP_036706633) |                                                                                    |
|                                  | vB_PsaS_PD23 | ser | 61,802 | 66.5 | 70 | -                             | -                              | fused (WP_036706671)          | muramidase<br>(WP_036706647<br>)    | -                                                                           | m <sup>4</sup> C/m <sup>6</sup> A<br>(WP_036706686)                                                                                            |                                                                                                                                             |                                                                                        |                                                                                    |
|                                  | vB_PsaS_PD24 | tyr | 49,592 | 65.1 | 52 | -                             | putative<br>(WP_0367067<br>75) | present<br>(WP_0367068<br>10) | present<br>(WP_0367068<br>13)       | muramidase<br>(WP_036706958<br>)                                            | putative<br>(WP_0367068<br>36)                                                                                                                 | m <sup>4</sup> C/m <sup>6</sup> A<br>(WP_036706793),<br>m <sup>4</sup> C/m <sup>6</sup> A<br>(WP_036706795)                                 | type III<br>(WP_0<br>521747<br>62,<br>WP_03<br>670679<br>0)                            | type II Ttoxin-antitoxin<br>system RelBE family<br>(WP_036706860,<br>WP_036706862) |
|                                  | vB_PsaS_PD25 | tyr | 32,827 | 66.9 | 42 | -                             | putative<br>(WP_0521747<br>70) | fused (WP_036707013)          | M15 peptidase<br>(WP_036706981<br>) | putative<br>(WP_0367069<br>82)                                              | m <sup>4</sup> C/m <sup>6</sup> A<br>(WP_036707033),<br>m <sup>5</sup> C<br>(WP_036707038),<br>m <sup>4</sup> C/m <sup>6</sup> A<br>(pd25_p36) | -                                                                                                                                           | -                                                                                      |                                                                                    |
|                                  | vB_PsaS_PD26 | tnp | 44,577 | 68.5 | 56 | present<br>(WP_0367073<br>18) | putative<br>(WP_0521747<br>92) | present<br>(WP_0367073<br>49) | present<br>(WP_0367012<br>37)       | N-<br>acetylmuramyl-<br>L-alanine<br>amidase<br>(WP_036707337<br>)          | -                                                                                                                                              | m <sup>4</sup> C/m <sup>6</sup> A<br>(WP_036707315)                                                                                         | -                                                                                      | -                                                                                  |
|                                  | vB_PsaS_PD27 | tnp | 41,697 | 68.5 | 60 | present<br>(WP_0521761<br>00) | present<br>(WP_0367306<br>80)  | present<br>(WP_0367306<br>05) | present<br>(WP_0367306<br>01)       | N-<br>acetylmuramyl-<br>L-alanine<br>amidase<br>(WP_036730626<br>)          | -                                                                                                                                              | m <sup>4</sup> C/m <sup>6</sup> A<br>(WP_052176079)                                                                                         | -                                                                                      | -                                                                                  |
| <i>P. sanguinis</i><br>DSM 29303 | vB_PsaS_PD28 | tnp | 39,255 | 68.5 | 57 | present<br>(WP_0748269<br>95) | -                              | present<br>(WP_0367316<br>16) | present<br>(WP_0367316<br>18)       | N-<br>acetylmuramyl-<br>L-alanine<br>amidase<br>(WP_036731608<br>)          | -                                                                                                                                              | m <sup>4</sup> C/m <sup>6</sup> A<br>(WP_036731591)                                                                                         | -                                                                                      | -                                                                                  |
|                                  | vB_PsaS_PD29 | tyr | 51,410 | 65.3 | 58 | -                             | putative<br>(WP_0521762<br>18) | present<br>(WP_0367315<br>52) | present<br>(WP_0367315<br>56)       | muramidase<br>(WP_074827033<br>) and peptidase<br>M15<br>(WP_036734832<br>) | putative<br>(WP_0367348<br>30)                                                                                                                 | m <sup>4</sup> C/m <sup>6</sup> A<br>(WP_036731541),<br>m <sup>4</sup> C/m <sup>6</sup> A<br>(WP_036731536),<br>m <sup>5</sup> C (pd29_p48) | type II<br>(WP_0<br>367315<br>33,<br>WP_07<br>482703<br>9)                             | -                                                                                  |
| <i>P. sediminis</i><br>DSM 26170 | vB_PseS_PD30 | tyr | 48,532 | 64.7 | 48 | -                             | putative<br>(WP_0893861<br>71) | present<br>(WP_0893861<br>51) | present<br>(WP_0893861<br>53)       | M15 peptidase<br>(WP_089386138<br>)                                         | putative<br>(WP_0179984<br>90)                                                                                                                 | m <sup>4</sup> C/m <sup>6</sup> A<br>(WP_089386160),<br>m <sup>4</sup> C/m <sup>6</sup> A<br>(WP_089386161),                                | type I<br>(WP_0<br>893861<br>63,                                                       | -                                                                                  |

|                                      |              |     |        |      |    |                                |                                |                               |                               |                                                                                          |                                |                                                                                            |                                                                                                             |                                                                                                                                                                      |
|--------------------------------------|--------------|-----|--------|------|----|--------------------------------|--------------------------------|-------------------------------|-------------------------------|------------------------------------------------------------------------------------------|--------------------------------|--------------------------------------------------------------------------------------------|-------------------------------------------------------------------------------------------------------------|----------------------------------------------------------------------------------------------------------------------------------------------------------------------|
|                                      |              |     |        |      |    |                                |                                |                               |                               |                                                                                          |                                | m <sup>5</sup> C<br>(WP_089386167)                                                         | WP_08<br>938616<br>4,<br>WP_08<br>938616<br>5)                                                              |                                                                                                                                                                      |
| <i>P. solventivorans</i><br>DSM 6637 | vB_PsoS_PD31 | ser | 42,946 | 66.0 | 63 | putative<br>(WP_0730620<br>47) | -                              | present<br>(WP_0730612<br>59) | present<br>(WP_0730612<br>62) | muramidase<br>(WP_073061326<br>)                                                         | putative<br>(WP_0730613<br>29) | -                                                                                          | -                                                                                                           | -                                                                                                                                                                    |
| <i>Paracoccus</i> sp.<br>BM15        | vB_PspS_PD32 | tyr | 51,828 | 60.8 | 51 | -                              | putative<br>(WP_1014590<br>25) | present<br>(WP_1014590<br>41) | present<br>(WP_1014590<br>43) | M15 peptidase<br>(WP_101459061<br>)                                                      | -                              | m <sup>4</sup> C/m <sup>6</sup> A<br>(WP_101459033)                                        | type I<br>(WP_1<br>014590<br>30,<br>WP_10<br>145903<br>1,<br>WP_10<br>146180<br>4,<br>WP_10<br>145903<br>2) | -                                                                                                                                                                    |
|                                      | vB_PspS_PD33 | tyr | 50,035 | 63.6 | 58 | -                              | putative<br>(WP_1014619<br>15) | present<br>(WP_1014597<br>94) | present<br>(WP_1014590<br>43) | M15 peptidase<br>(WP_101459809<br>)                                                      | -                              | m <sup>4</sup> C/m <sup>6</sup> A<br>(WP_101459785),<br>m <sup>5</sup> C<br>(WP_101459786) | Type II<br>(WP_1<br>014598<br>12,<br>WP_10<br>146180<br>4,<br>WP_10<br>145903<br>2)                         | lead, cadmium, zinc,<br>mercury transporter<br>(WP_101461915), coper<br>transporting ATPase<br>(WP_101461912)<br>multicoper oxidase family<br>protein (WP_101459778) |
|                                      | vB_PspS_PD34 | ser | 44,369 | 67.8 | 53 | -                              | -                              | fused (WP_101498968)          |                               | muramidase<br>(WP_101498972<br>)                                                         | -                              | m <sup>4</sup> C/m <sup>6</sup> A<br>(WP_101498964)                                        | -                                                                                                           | zinc/cadmium/lead-<br>transporting ATPase ZntA<br>(WP_090735031)                                                                                                     |
| <i>Paracoccus</i> sp.<br>CBA4604     | vB_PspS_PD35 | ser | 50,207 | 63.2 | 54 | present<br>(WP_1014989<br>88)  | putative<br>(WP_1014989<br>90) | fused (WP_101499007)          |                               | M15 peptidase<br>(WP_101500871<br>)                                                      | -                              | m <sup>4</sup> C/m <sup>6</sup> A<br>(WP_101498999)                                        | -                                                                                                           | -                                                                                                                                                                    |
|                                      | vB_PspS_PD36 | tyr | 44,896 | 64.7 | 53 | -                              | putative<br>(WP_1014983<br>61) | fused (WP_101498348)          |                               | M15 peptidase<br>(WP_101500774<br>)                                                      | putative<br>(WP_1014983<br>35) | m <sup>5</sup> C<br>(WP_101498356),<br>m <sup>4</sup> C/m <sup>6</sup> A<br>(WP_101500775) | type II<br>(WP_1<br>014983<br>66,<br>WP_10<br>149836<br>7)                                                  | -                                                                                                                                                                    |
| <i>Paracoccus</i> sp.<br>J39         | vB_PspS_PD37 | tyr | 40,213 | 63.6 | 65 | present<br>(WP_0514764<br>44)  | -                              | present<br>(WP_0287168<br>90) | present<br>(WP_0287168<br>89) | PGBP-N-<br>acetylmuramidase<br>(WP_028716871<br>)                                        | -                              | -                                                                                          | -                                                                                                           | type II toxin-antitoxin<br>system HicAB family<br>(WP_028716902,<br>WP_028716903)                                                                                    |
| <i>Paracoccus</i> sp.<br>N5          | vB_PspS_PD38 | tyr | 46,553 | 64.3 | 66 | putative<br>(WP_0179999<br>05) | -                              | fused (WP_017999920)          |                               | muramidase<br>(WP_017999939<br>) and PGBP - N-<br>acetylmuramidase<br>(WP_017999945<br>) | putative<br>(WP_0367446<br>03) | -                                                                                          | -                                                                                                           | -                                                                                                                                                                    |
| <i>Paracoccus</i> sp.<br>S4493       | vB_PspS_PD39 | tyr | 37,866 | 62.7 | 55 | putative<br>(WP_0712094<br>55) | putative<br>(pd39_p12)         | present<br>(WP_0459807<br>56) | present<br>(WP_0527144<br>99) | N-<br>acetylmuramoyl-<br>L-alanine<br>amidase                                            | putative<br>(WP_0459807<br>67) | m <sup>4</sup> C/m <sup>6</sup> A<br>(WP_045980739)                                        | -                                                                                                           | -                                                                                                                                                                    |

|                                                 |              |     |        |      |    |                                |                                |                               |                                                                |                                                                  |                                                                                                                                                                     |                                                                                                                                                    |                                                                                    |                                                                                                                               |
|-------------------------------------------------|--------------|-----|--------|------|----|--------------------------------|--------------------------------|-------------------------------|----------------------------------------------------------------|------------------------------------------------------------------|---------------------------------------------------------------------------------------------------------------------------------------------------------------------|----------------------------------------------------------------------------------------------------------------------------------------------------|------------------------------------------------------------------------------------|-------------------------------------------------------------------------------------------------------------------------------|
|                                                 |              |     |        |      |    |                                |                                |                               | (WP_052714511)                                                 |                                                                  |                                                                                                                                                                     |                                                                                                                                                    |                                                                                    |                                                                                                                               |
|                                                 |              |     |        |      |    |                                |                                |                               | N-<br>acetylmuramyl-<br>L-alanine<br>amidase<br>(WP_071209474) | putative<br>(WP_0459821<br>72)                                   | m <sup>5</sup> C<br>(WP_071209475)                                                                                                                                  | -                                                                                                                                                  | -                                                                                  |                                                                                                                               |
| <i>Paracoccus</i> sp.<br>SCN 68-21              | vB_PspP_PD41 | tyr | 48,266 | 64.6 | 63 | putative<br>(WP_0459821<br>96) | -                              | -                             | present<br>(ODT60961)                                          | muramidase<br>(ODT61017)                                         | putative<br>(ODT60966)                                                                                                                                              | m <sup>4</sup> C/m <sup>6</sup> A<br>(ODT60998)                                                                                                    | -                                                                                  | -                                                                                                                             |
|                                                 |              |     |        |      |    |                                |                                |                               | N-<br>acetylmuramyl-<br>L-alanine<br>amidase<br>(WP_072295521) | putative<br>(WP_0722955<br>22)                                   | m <sup>4</sup> C/m <sup>6</sup> A<br>(WP_072295480),<br>m <sup>1</sup> C/m <sup>6</sup> A<br>(WP_072295482),<br>m <sup>2</sup> C/m <sup>6</sup> A<br>(WP_072295523) | -                                                                                                                                                  | -                                                                                  |                                                                                                                               |
| <i>Paracoccus</i> sp.<br>SM22M-07               | vB_PspP_PD43 | tyr | 44,599 | 63.4 | 67 | putative<br>(WP_0722961<br>21) | putative<br>(pd43_p21)         | present<br>(WP_0722961<br>40) | present<br>(WP_0722961<br>41)                                  | muramidase<br>(WP_072296160)                                     | putative<br>(WP_0722961<br>58)                                                                                                                                      | m <sup>5</sup> C<br>(WP_072296110)                                                                                                                 | -                                                                                  | -                                                                                                                             |
|                                                 |              |     |        |      |    |                                |                                |                               | N-<br>acetylmuramyl-<br>L-alanine<br>amidase<br>(WP_072297768) | putative<br>(WP_0722977<br>69)                                   | -                                                                                                                                                                   | -                                                                                                                                                  | TerC family protein<br>(WP_072297798)                                              |                                                                                                                               |
| <i>P.</i><br><i>sphaerophysae</i><br>HAMBI 3106 | vB_PspS_PD45 | tyr | 58,117 | 66.0 | 59 | -                              | putative<br>(WP_0367179<br>17) | fused (WP_036717976)          |                                                                | muramidase<br>(WP_036718003<br>)                                 | -                                                                                                                                                                   | m <sup>1</sup> C/m <sup>6</sup> A<br>(WP_036717944),<br>m <sup>5</sup> C (pd45_p21),<br>m <sup>1</sup> C/m <sup>6</sup> A<br>(WP_036718022)        | -                                                                                  | type II toxin-antitoxin<br>system VapBC family<br>(WP_036718052,<br>WP_036717998)                                             |
| <i>P. versutus</i> DSM<br>582                   | vB_PveS_PD46 | ser | 41,696 | 67.6 | 49 | -                              | -                              | fused (WP_036751158)          |                                                                | M15 peptidase<br>(WP_036751128<br>)                              | putative<br>(WP_0367511<br>31)                                                                                                                                      | m <sup>5</sup> C (pd46_p30),<br>m <sup>1</sup> C/m <sup>6</sup> A<br>(WP_036751173)                                                                | -                                                                                  | -                                                                                                                             |
|                                                 |              |     |        |      |    |                                |                                |                               |                                                                | M15 peptidase<br>(WP_028720621<br>)                              | putative<br>(WP_0287206<br>20)                                                                                                                                      | m <sup>4</sup> C/m <sup>6</sup> A<br>(WP_028720653),<br>m <sup>1</sup> C/m <sup>6</sup> A<br>(WP_028720654),<br>m <sup>5</sup> C<br>(WP_028720662) | type III<br>(WP_0<br>515783<br>29,<br>WP_02<br>872065<br>9)                        | magnesium and cobalt<br>transporter CorA<br>(WP_028720649)                                                                    |
| <i>P. yeei</i> ATCC<br>BAA-599                  | vB_PyeS_PD48 | ser | 43,101 | 68.1 | 55 | -                              | -                              | fused (WP_028720226)          |                                                                | muramidase<br>(WP_028720236<br>) and peptidase<br>M15 (pd48_p55) | -                                                                                                                                                                   | m <sup>1</sup> C/m <sup>6</sup> A<br>(WP_028720217),<br>m <sup>5</sup> C (pd48_p23)                                                                | -                                                                                  | type II toxin-antitoxin<br>system VapBC family<br>(WP_028720231,<br>WP_028720232)                                             |
|                                                 |              |     |        |      |    |                                |                                |                               |                                                                | M15 peptidase<br>(WP_028720907<br>)                              | putative<br>(WP_0287209<br>06)                                                                                                                                      | m <sup>5</sup> C<br>(WP_028720878),<br>m <sup>4</sup> C/m <sup>6</sup> A<br>(WP_028720883),<br>m <sup>1</sup> C/m <sup>6</sup> A<br>(WP_036763606) | type I<br>(WP_0<br>287208<br>80,<br>WP_05<br>157832<br>5,<br>WP_02<br>872088<br>2) | zinc transporter ZitB<br>(WP_007803328), type II<br>toxin-antitoxin system<br>ParDE family<br>(WP_028720911,<br>WP_028720912) |
| <i>P. yeei</i> TT13                             | vB_PyeM_PD50 | tyr | 54,200 | 65.0 | 80 | present<br>(ATQ56181)          | -                              | present<br>(ATQ56198)         | present<br>(ATQ56200)                                          | PGBP<br>(ATQ56229)                                               | -                                                                                                                                                                   | m <sup>5</sup> C 9ATQ56170),<br>m <sup>1</sup> C/m <sup>6</sup> A<br>(ATQ56173)                                                                    | -                                                                                  | type II toxin-antitoxin<br>system HicBA family<br>(ATQ56191, ATQ56192)                                                        |

|              |     |        |      |    |   |   |                    |                                              |                       |                                                                           |                                                                |                                                                  |   |
|--------------|-----|--------|------|----|---|---|--------------------|----------------------------------------------|-----------------------|---------------------------------------------------------------------------|----------------------------------------------------------------|------------------------------------------------------------------|---|
| vB_PyeS_PD51 | tyr | 38,463 | 61.7 | 39 | - | - | fused (ATQ56549)   | N-acetylmuramyl-L-alanine amidase (ATQ56566) | putative (ATQ56567)   | m <sup>5</sup> C (ATQ56541)                                               | -                                                              | -                                                                |   |
| vB_PyeS_PD52 | ser | 52,363 | 67.8 | 61 | - | - | present (ATQ56683) | present (ATQ56681)                           | muramidase (ATQ56670) | -                                                                         | m <sup>5</sup> C (pd52_p36), m <sup>3</sup> C/m <sup>6</sup> A | -                                                                | - |
| vB_PyeS_PD53 | ser | 44,067 | 65,3 | 58 | - | - | fused (ATQ56739)   | muramidase (ATQ56729)                        | -                     | m <sup>5</sup> C (ATQ56748), m <sup>4</sup> C/m <sup>6</sup> A (ATQ56749) | -                                                              | type II toxin-antitoxin system HigBA family (ATQ56767, ATQ56766) |   |
